# Supplementary material
Source: MDPI journal article supplement (https://www.mdpi.com/2076-3417/13/8/5176)
Supplement: s1 [file s1]

**Supplementary Table S1.** Literature search performed in each database

| Nr | Database           | Search                                                                                                                                                                                                                                                                                          | Limits | Hits |
|----|--------------------|-------------------------------------------------------------------------------------------------------------------------------------------------------------------------------------------------------------------------------------------------------------------------------------------------|--------|------|
| 1  | PubMed             | (Non-compliance or noncompliance) OR (distalization or distalize or distal) OR (mini-implants or mini-implants or miniscrews) AND (maxillary molar distalization or intraoral distalizing appliance or distalizing devices or intraoral appliances) AND (Class II malocclusion) AND (anchorage) | -      | 265  |
| 2  | CDSR               | Ortodont* AND (distalization OR maxillary molars OR noncompliance OR mini-implants)                                                                                                                                                                                                             | -      | 17   |
| 3  | Google Scholar     | (Non-compliance OR noncompliance) OR (distalization OR distalize OR distal) OR (mini-implants OR mini implants OR miniscrews) AND (maxillary molar distalization OR intraoral distalizing appliance OR distalizing devices OR intraoral appliances) AND (Class II malocclusion) AND (anchorage) | -      | 164  |
| 4  | Clinicaltrials.gov | “maxillary molar distalization”<br>“distalization with mini-implants”                                                                                                                                                                                                                           | -      | 4    |
| 5  | Embase             | orthodont* AND maxillary AND molar AND distalization AND (mini implants OR miniscrews)                                                                                                                                                                                                          | -      | 55   |
|    |                    | TOTAL                                                                                                                                                                                                                                                                                           |        | 505  |

**Supplementary Table S2.** List of studies from the literature and their inclusion/exclusion status

| Nr | Paper                                                                                                                                                                                                                                                                                 | Status            |
|----|---------------------------------------------------------------------------------------------------------------------------------------------------------------------------------------------------------------------------------------------------------------------------------------|-------------------|
| 1  | Luciana Duarte Caldas, Renata de Faria Santos, Anna Paula Nigri, Eduardo Franzotti Sant'Anna, Maxillary expansion and first molar distalization achieved simultaneously by using a palatal miniscrew-system appliance: Report of two patients. AJO-DO Clinical Companion, 2022 April. | Excluded by title |
| 2  | Caruso S, Nota A, Ehsani S, Maddalone E, Ojima K, Tecco S. Impact of molar teeth distalization with clear aligners on occlusal vertical dimension: a retrospective study. BMC Oral Health. 2019 Aug 13;19(1):182                                                                      | Excluded by title |
| 3  | Hashem AS. Effect of second molar eruption on efficiency of maxillary first molar distalization using Carriere distalizer appliance. Dental Press J Orthod. 2021 Aug 27;26(4):e2119146                                                                                                | Excluded by title |
| 4  | Mohamed Bayome, Jae Hyun Park, Yoon-Ah Kook. Clinical applications and treatment outcomes with modified C-palatal plates. Seminars in Orthodontics 2018 March ; 24 (1) 45-51.                                                                                                         | Excluded by title |
| 5  | Metin Nur, Mehmet Bayram, Alper Pampu. Zygoma-gear appliance for intraoral upper molar distalization. Korean J Orthod 2010 January;40(3):195-206.                                                                                                                                     | Excluded by title |
| 6  | Tina Keun Nan Park. Three-dimensional analysis of maxillary retromolar alveolar bone before and after en-masse distalization. ProQuest Number 10800903, May 2016.                                                                                                                     | Excluded by title |
| 7  | Noorollahian S, Alavi S, Shirban F. Non-compliance Appliances for Upper Molar Distalization: An Overview. Int J Orthod Milwaukee. 2015 Fall;26(3):31-6                                                                                                                                | Excluded by title |
| 8  | Auladell A, De La Iglesia F, Quevedo O, Walter A, Puigdollers A. The efficiency of molar distalization using clear aligners and mini-implants: Two clinical cases. Int Orthod. 2022 Mar;20(1):100604.                                                                                 | Excluded by title |
| 9  | Chen R.-X, Lin XP. Analysis of bone around buccal roots of maxillary molars for miniscrew placement for whole dentition distalization using cone beam computed tomography. Journal of Jilin University Medicine 2012 Mar;38(2): 346 – 351.                                            | Excluded by title |
| 10 | Fouda AS, Attia KH, Abouelezz AM, El-Ghafour MA, Aboufotouh MH. Anchorage control using miniscrews in comparison to Essix appliance in treatment of postpubertal patients with Class II malocclusion using Carrière Motion Appliance. Angle Orthod. 2022 Jan 1;92(1):45-54.           | Excluded by title |

|    |                                                                                                                                                                                                                                                                                                |                   |
|----|------------------------------------------------------------------------------------------------------------------------------------------------------------------------------------------------------------------------------------------------------------------------------------------------|-------------------|
| 11 | Vilanova L, Henriques JFC, Patel MP, Reis RS, Grec RHDC, Aliaga-Del Castillo A, Bellini-Pereira SA, Janson G. Class II malocclusion treatment changes with the Jones jig, Distal jet and First Class appliances. J Appl Oral Sci. 2020;28:e20190364                                            | Excluded by title |
| 12 | Mohamed Bayome, Jae Hyun Park, Yoon-Ah Kook. Clinical applications and treatment outcomes with modified C-palatal plates. Seminars in Orthodontics 2018 March ; 24 (1) 45-51.                                                                                                                  | Excluded by title |
| 13 | Marthinus Johannes Coetsee Jnr 1 and Marthinus Johannes Coetsee Snr. Unilateral Class II treatment using fixed orthodontic appliances with open coil spring, sliding hook and light Class II elastics. International Dent-African edition;10(4):18-30.                                         | Excluded by title |
| 14 | Auladell A, De La Iglesia F, Quevedo O, Walter A, Puigdollers A. The efficiency of molar distalization using clear aligners and mini-implants: Two clinical cases. Int Orthod. 2022 Mar;20(1):100604.                                                                                          | Excluded by title |
| 15 | D'Attilio M, Tecco S, Traini T, Spoto G, Festa F. Role of the friction free distalize appliance (2FDA)PAT in the molar distalization: photoelastic analysis and alkaline-phosphatase (ALP) activity on first molar and bicuspid. Int J Immunopathol Pharmacol. 2007 Jan-Mar;20(1 Suppl 1):61-7 | Excluded by title |
| 16 | Li C, Sfogliano L, Jiang W, Lee H, Zheng Z, Chung CH, Jones J. Total maxillary arch distalization by using headgear in an adult patient. Angle Orthod. 2021 Mar 1;91(2):267-278                                                                                                                | Excluded by title |
| 17 | Metzner R, Schwestka-Polly R, Helms HJ, Wiechmann D. Comparison of anchorage reinforcement with temporary anchorage devices or a Herbst appliance during lingual orthodontic protraction of mandibular molars without maxillary counterbalance extraction. Head Face Med. 2015 Jun 20;11:22    | Excluded by title |
| 18 | Serafin M, Fastuca R, Castellani E, Caprioglio A. Occlusal Plane Changes After Molar Distalization With a Pendulum Appliance in Growing Patients with Class II Malocclusion: A Retrospective Cephalometric Study. Turk J Orthod. 2021 Feb 23;34(1):10-17                                       | Excluded by title |
| 19 | Chung KR, Kim YJ, Jeon HH, Kim SH, Nelson G. The Biocrete Strategy. Part 6: Class III Treatment. J Clin Orthod. 2018 Nov;52(11):604-20                                                                                                                                                         | Excluded by title |
| 20 | Yeon BM, Lee NK, Park JH, Kim JM, Kim SH, Kook YA. Comparison of treatment effects after total mandibular arch distalization with miniscrews vs ramal plates in patients with Class III malocclusion. Am J Orthod Dentofacial Orthop. 2022 Apr;161(4):529-536.                                 | Excluded by title |
| 21 | Cakir E, Malkoç S, Kirtay M. Treatment of Class II malocclusion with mandibular skeletal anchorage. Am J Orthod Dentofacial Orthop. 2017 Jun;151(6):1169-1177                                                                                                                                  | Excluded by title |
| 22 | Acar AG, Gürsoy S, Dinçer M. Molar distalization with a pendulum appliance K-loop combination. Eur J Orthod. 2010 Aug;32(4):459-65                                                                                                                                                             | Excluded by title |
| 23 | Eissa O, ElShennawy M, Gaballah S, ElMehy G, El-Bialy T. Treatment of Class III malocclusion using miniscrew-anchored inverted Forsus FRD: Controlled clinical trial. Angle Orthod. 2018 Nov;88(6):692-701                                                                                     | Excluded by title |
| 24 | Okay C, Gülsen A, Keykubat A, Ucem TT, Yüksel S. A comparison of the effects of 2 mandibular anchorage systems used with a 3-dimensional bimetric maxillary distalizing arch. World J Orthod. 2006 Summer;7(2):125-33                                                                          | Excluded by title |
| 25 | Altug-Atac AT, Erdem D, Arat ZM. Three-dimensional bimetric maxillary distalization arches compared with a modified Begg intraoral distalization system. Eur J Orthod. 2008 Feb;30(1):73-9                                                                                                     | Excluded by title |
| 26 | Fuziy A, Rodrigues de Almeida R, Janson G, Angelieri F, Pinzan A. Sagittal, vertical, and transverse changes consequent to maxillary molar distalization with the pendulum appliance. Am J Orthod Dentofacial Orthop. 2006 Oct;130(4):502-10                                                   | Excluded by title |
| 27 | Patel MP, Janson G, Henriques JF, de Almeida RR, de Freitas MR, Pinzan A, de Freitas KM. Comparative distalization effects of Jones jig and pendulum appliances. Am J Orthod Dentofacial Orthop. 2009 Mar;135(3):336-42                                                                        | Excluded by title |
| 28 | Li M, Su X, Li Y, Li X, Si X. Cone-beam computed tomography-guided three-dimensional evaluation of treatment effectiveness of the Frog appliance. Korean J Orthod. 2019 May;49(3):161-169                                                                                                      | Excluded by title |
| 29 | Cornelis MA, De Clerck HJ. Maxillary molar distalization with miniplates assessed on digital models: a prospective clinical trial. Am J Orthod Dentofacial Orthop. 2007 Sep;132(3):373-7                                                                                                       | Excluded by title |
| 30 | Işık Aslan B, Balostuncer B, Dinçer M. Are there differences on tooth movement between different sectional canine retractors? J Orofac Orthop. 2013 May;74(3):226-35                                                                                                                           | Excluded by title |
| 31 | Fortini A, Lupoli M, Giuntoli F, Franchi L. Dentoskeletal effects induced by rapid molar distalization with the first class appliance. Am J Orthod Dentofacial Orthop. 2004 Jun;125(6):697-704                                                                                                 | Excluded by title |
| 32 | Burhan AS. Combined treatment with headgear and the Frog appliance for maxillary molar distalization: a randomized controlled trial. Korean J Orthod. 2013 Apr;43(2):101-9                                                                                                                     | Excluded by title |
| 33 | Keles A. Maxillary unilateral molar distalization with sliding mechanics: a preliminary investigation. Eur J Orthod. 2001 Oct;23(5):507-15                                                                                                                                                     | Excluded by title |
| 34 | Elkordy SA, Abouelezz AM, Fayed MM, Attia KH, Ishaq RA, Mostafa YA. Three-dimensional effects of the mini-implant-anchored Forsus Fatigue Resistant Device: A randomized controlled trial. Angle Orthod. 2016 Mar;86(2):292-305                                                                | Excluded by title |
| 35 | Saif BS, Pan F, Mou Q, Han M, Bu W, Zhao J, Guan L, Wang F, Zou R, Zhou H, Guo YC. Efficiency evaluation of maxillary molar distalization using Invisalign based on palatal rugae registration. Am J Orthod Dentofacial Orthop. 2022 Apr;161(4):e372-e379                                      | Excluded by title |
| 36 | Patel MP, Henriques JF, Freitas KM, Grec RH. Cephalometric effects of the Jones Jig appliance followed by fixed appliances in Class II malocclusion treatment. Dental Press J Orthod. 2014 May-Jun;19(3):44-51                                                                                 | Excluded by title |
| 37 | Kilkis D, Bayram M, Celikoglu M, Nur M. Unilateral maxillary molar distalization with zygoma-gear appliance. Am J Orthod Dentofacial Orthop. 2012 Aug;142(2):e1-7                                                                                                                              | Excluded by title |
| 38 | Hye-Jin Kim, Mohamed Bayome, Vu Thi Thu Trang, Justyn Park, Yoon-Ah Kook. Treatment Effects of Maxillary Molar Distalization with Palatal Plate: CBCT Synthesized Cephalometric Analysis. J Korean Academy of Advanced General Dentistry 2014 March; 3:1-7.                                    | Excluded by title |
| 39 | Patel MP, Henriques JF, de Almeida RR, Pinzan A, Janson G, de Freitas MR. Comparative cephalometric study of Class II malocclusion treatment with Pendulum and Jones jig appliances followed by fixed corrective orthodontics. Dental Press J Orthod. 2013 Nov-Dec;18(6):58-64                 | Excluded by title |
| 40 | Markic G, Katsaros C, Pandis N, Eliades T. Temporary anchorage device usage: a survey among Swiss orthodontists. Prog Orthod. 2014 Apr 1;15(1):29                                                                                                                                              | Excluded by title |

|    |                                                                                                                                                                                                                                                                                                    |                      |
|----|----------------------------------------------------------------------------------------------------------------------------------------------------------------------------------------------------------------------------------------------------------------------------------------------------|----------------------|
| 41 | Tekale PD, Vakil KK, Vakil JK, Gore KA. Distalization of maxillary arch and correction of Class II with mini-implants: A report of two cases. <i>Contemp Clin Dent</i> . 2015 Apr-Jun;6(2):226-32                                                                                                  | Excluded by title    |
| 42 | Bondemark L, Thornéus J. Anchorage provided during intra-arch distal molar movement: a comparison between the Nance appliance and a fixed frontal bite plane. <i>Angle Orthod</i> . 2005 May;75(3):437-43                                                                                          | Excluded by title    |
| 43 | Lee, Jin-Woo. "Analysis of Effects from Usage of Skeletal Anchorage-Assisted Pendulum Appliance on Vertical Component of Craniofacial Structure." <i>Journal of Dental Rehabilitation and Applied Science, Korean Academy of Stomatognathic Function and Occlusion</i> . 2018 March; 34(1): 10–16. | Excluded by title    |
| 44 | Bondemark L, Kurol J. Class II correction with magnets and superelastic coils followed by straight-wire mechanotherapy. Occlusal changes during and after dental therapy. <i>J Orofac Orthop</i> . 1998;59(3):127-38                                                                               | Excluded by title    |
| 45 | Metzner R, Schweska-Polly R, Helms HJ, Wiechmann D. Comparison of anchorage reinforcement with temporary anchorage devices or a Herbst appliance during lingual orthodontic protraction of mandibular molars without maxillary counterbalance extraction. <i>Head Face Med</i> . 2015 Jun 20;11:22 | Excluded by title    |
| 46 | Kobayashi M, Fushima K. Orthodontic skeletal anchorage using a palatal external plate. <i>J Orthod</i> . 2014 Mar;41(1):53-62                                                                                                                                                                      | Excluded by title    |
| 47 | Ganesh G, Tripathi T, Rai P. Orthopaedic and orthodontic treatment with hyrax, Class III elastics on mandibular miniplates, maxillary mini-implants in a Class III adolescent: A case report. <i>Int Orthod</i> . 2020 Dec;18(4):827-838                                                           | Excluded by title    |
| 48 | Waters D, Harris EF. Cephalometric comparison of maxillary second molar extraction and nonextraction treatments in patients with Class II malocclusions. <i>Am J Orthod Dentofacial Orthop</i> . 2001 Dec;120(6):608-13                                                                            | Excluded by abstract |
| 49 | Miyamoto Y, Kanzaki H, Nakamura Y. Orthodontic treatment of acquired open bite accompanied with extreme mesially inclined mandibular molars. <i>Int Orthod</i> . 2018 Dec;16(4):744-760                                                                                                            | Excluded by title    |
| 50 | Aslan BI, Kucukkaraca E, Turkoz C, Dincer M. Treatment effects of the Forsus Fatigue Resistant Device used with miniscrew anchorage. <i>Angle Orthod</i> . 2014 Jan;84(1):76-87                                                                                                                    | Excluded by title    |
| 51 | Alkumru P, Erdem D, Altug-Atac AT. Evaluation of changes in the vertical facial dimension with different anchorage systems in extraction and non-extraction subjects treated by Begg fixed appliances: a retrospective study. <i>Eur J Orthod</i> . 2007 Oct;29(5):508-16                          | Excluded by title    |
| 52 | Haydar S, Uner O. Comparison of Jones jig molar distalization appliance with extraoral traction. <i>Am J Orthod Dentofacial Orthop</i> . 2000 Jan;117(1):49-53                                                                                                                                     | Excluded by title    |
| 53 | Ishida T, Yoon HS, Ono T. Asymmetrical distalization of maxillary molars with zygomatic anchorage, improved superelastic nickel-titanium alloy wires, and open-coil springs. <i>Am J Orthod Dentofacial Orthop</i> . 2013 Oct;144(4):583-93                                                        | Excluded by title    |
| 54 | Yeon BM, Lee NK, Park JH, Kim JM, Kim SH, Kook YA. Comparison of treatment effects after total mandibular arch distalization with miniscrews vs ramal plates in patients with Class III malocclusion. <i>Am J Orthod Dentofacial Orthop</i> . 2022 Apr;161(4):529-536                              | Excluded by title    |
| 55 | Bussick TJ, McNamara JA Jr. Dentoalveolar and skeletal changes associated with the pendulum appliance. <i>Am J Orthod Dentofacial Orthop</i> . 2000 Mar;117(3):333-43                                                                                                                              | Excluded by title    |
| 56 | Talapane AK, Supraja G, Prasad M, Kommi PB. Comparison of sagittal and vertical dental changes during first phase of orthodontic treatment with MBT vs ROTH prescription. <i>Indian J Dent Res</i> . 2012 Mar-Apr;23(2):182-6                                                                      | Excluded by title    |
| 57 | Chang NY, Park JH, Lee MY, Cho JW, Cho JH, An KY, Chae JM. Orthodontic Treatment of Maxillary Incisors with Severe Root Resorption Caused by Bilateral Canine Impaction in a Class II Division 1 Patient. <i>J Clin Pediatr Dent</i> . 2016;40(2):161-8                                            | Excluded by title    |
| 58 | Bondemark L. A comparative analysis of distal maxillary molar movement produced by a new lingual intra-arch Ni-Ti coil appliance and a magnetic appliance. <i>Eur J Orthod</i> . 2000 Dec;22(6):683-95                                                                                             | Excluded by title    |
| 59 | Kaya B, Arman A, Uçkan S, Yazici AC. Comparison of the zygoma anchorage system with cervical headgear in buccal segment distalization. <i>Eur J Orthod</i> . 2009 Aug;31(4):417-24                                                                                                                 | Excluded by title    |
| 60 | Sim JM, Galella SA. The controlled arch system: a new method of straightwire treatment. <i>J Gen Orthod</i> . 1999 Winter;10(4):9-15                                                                                                                                                               | Excluded by title    |
| 61 | Oztürk Y, Firatli S, Almac L. An evaluation of intraoral molar distalization with nickel-titanium coil springs. <i>Quintessence Int</i> . 2005 Oct;36(9):731-5                                                                                                                                     | Excluded by title    |
| 62 | Kim HJ, Jang WS, Park HS. Anatomical Limits for Distalization of Lower Posterior Molars with Micro-Implant Anchorage. <i>J Clin Orthod</i> . 2019;53(5):305-313                                                                                                                                    | Excluded by title    |
| 63 | Ishida Y, Ono T. Nonsurgical treatment of an adult with a skeletal Class II gummy smile using zygomatic temporary anchorage devices and improved superelastic nickel-titanium alloy wires. <i>Am J Orthod Dentofacial Orthop</i> . 2017 Nov;152(5):693-705                                         | Excluded by title    |
| 64 | Nagayama K, Tomonari H, Kitashima F, Miyawaki S. Extraction treatment of a class II division 2 malocclusion with mandibular posterior discrepancy and changes in stomatognathic function. <i>Angle Orthod</i> . 2015 Mar;85(2):314-21                                                              | Excluded by title    |
| 65 | Jing Y, Han X, Guo Y, Li J, Bai D. Nonsurgical correction of a Class III malocclusion in an adult by miniscrew-assisted mandibular dentition distalization. <i>Am J Orthod Dentofacial Orthop</i> . 2013 Jun;143(6):877-87                                                                         | Excluded by title    |
| 66 | Ohura R, Kuroda S, Takahashi T, Tomita Y, Tanaka E. Efficient usage of implant anchorage to treat overerupted maxillary first molar and mesially inclined mandibular molars. <i>Am J Orthod Dentofacial Orthop</i> . 2011 Jan;139(1):113-22                                                        | Excluded by title    |
| 67 | Du X, Hägg U, Rabie AB. Effects of headgear Herbst and mandibular step-by-step advancement versus conventional Herbst appliance and maximal jumping of the mandible. <i>Eur J Orthod</i> . 2002 Apr;24(2):167-74                                                                                   | Excluded by title    |
| 68 | Chen K, Cao Y. Class III malocclusion treated with distalization of the mandibular dentition with miniscrew anchorage: A 2-year follow-up. <i>Am J Orthod Dentofacial Orthop</i> . 2015 Dec;148(6):1043-53                                                                                         | Excluded by title    |
| 69 | Patil HAH, Kerudi VV, Patil NS, Tekale PD, Verulkar A. The zygoma-gear appliance for maxillary molar distalization. <i>J Clin Orthod</i> . 2018 Aug;52(8):412-418                                                                                                                                  | Excluded by title    |

|     |                                                                                                                                                                                                                                                                                                        |                   |
|-----|--------------------------------------------------------------------------------------------------------------------------------------------------------------------------------------------------------------------------------------------------------------------------------------------------------|-------------------|
| 70  | Hashimoto T, Fukunaga T, Kuroda S, Sakai Y, Yamashiro T, Takano-Yamamoto T. Mandibular deviation and canted maxillary occlusal plane treated with miniscrews and intraoral vertical ramus osteotomy: functional and morphologic changes. <i>Am J Orthod Dentofacial Orthop.</i> 2009 Dec;136(6):868-77 | Excluded by title |
| 71  | Ikedo Y, Kokai S, Ono T. A patient with mandibular deviation and 3 mandibular incisors treated with asymmetrically bent improved superelastic nickel-titanium alloy wires. <i>Am J Orthod Dentofacial Orthop.</i> 2018 Jan;153(1):131-143                                                              | Excluded by title |
| 72  | Tomonari H, Yagi T, Kuninori T, Ikemori T, Miyawaki S. Replacement of a first molar and 3 second molars by the mesial inclination of 4 impacted third molars in an adult with a Class II Division 1 malocclusion. <i>Am J Orthod Dentofacial Orthop.</i> 2015 Jun;147(6):755-65                        | Excluded by title |
| 73  | Poletti L, Silvera AA, Ghislanzoni LT. Dentoalveolar class III treatment using retromolar miniscrew anchorage. <i>Prog Orthod.</i> 2013 May 23; 14:7                                                                                                                                                   | Excluded by title |
| 74  | Ishida T, Ono T. Asymmetric severe skeletal Class II division 1 patient with temporomandibular joint disorder treated with zygomatic anchorage devices and Ni-Ti alloy wires. <i>Angle Orthod.</i> 2014 Sep;84(5):919-30                                                                               | Excluded by title |
| 75  | Zimmer B, Rottwinkel Y. Orthodontic space closure without counterbalancing extractions in patients with bilateral aplasia of the lower second premolars. <i>J Orofac Orthop.</i> 2002 Sep;63(5):400-21                                                                                                 | Excluded by title |
| 76  | Hsu YL, Chang CH, Roberts WE. Canine-lateral incisor transposition: Controlling root resorption with a bone-anchored T-loop retraction. <i>Am J Orthod Dentofacial Orthop.</i> 2016 Dec;150(6):1039-1050                                                                                               | Excluded by title |
| 77  | Er K, Bayram M, Taşdemir T. Root canal treatment of a periradicular lesion caused by unintentional root damage after orthodontic miniscrew placement: a case report. <i>Int Endod J.</i> 2011 Dec;44(12):1170-5                                                                                        | Excluded by title |
| 78  | Luecke PE 3rd, Johnston LE Jr. The effect of maxillary first premolar extraction and incisor retraction on mandibular position: testing the central dogma of "functional orthodontics". <i>Am J Orthod Dentofacial Orthop.</i> 1992 Jan;101(1):4-12                                                    | Excluded by title |
| 79  | Garino F, Favero L. Control of tooth movements with the Speed system. <i>Prog Orthod.</i> 2003;4:23-30                                                                                                                                                                                                 | Excluded by title |
| 80  | Sada Garralda VJ. Simultaneous Intrusion and Distalization Using Miniscrews in the Maxillary Tuberosity. <i>J Clin Orthod.</i> 2016 Oct;50(10):605-612                                                                                                                                                 | Excluded by title |
| 81  | Sabri R. Treatment of a unilateral Class II crossbite malocclusion with traumatic loss of a maxillary central incisor and a lateral incisor. <i>Am J Orthod Dentofacial Orthop.</i> 2006 Dec;130(6):759-70                                                                                             | Excluded by title |
| 82  | Giancotti A, Greco M, Mampieri G, Arcuri C. The use of titanium miniscrews for molar protraction in extraction treatment. <i>Prog Orthod.</i> 2004;5(2):236-47                                                                                                                                         | Excluded by title |
| 83  | Chen LL, Xu TM, Lin JX. [Preliminary clinical application of Tip-Edge Plus appliance in the treatment of Class II patients]. <i>Zhonghua Kou Qiang Yi Xue Za Zhi.</i> 2008 Dec;43(12):719-22                                                                                                           | Excluded by title |
| 84  | Kurt G, İleri H, Kişniçi R. Rapid tooth movement and orthodontic treatment using dentoalveolar distraction (DAD). Long-term (5 years) follow-up of a Class II case. <i>Angle Orthod.</i> 2010 May;80(3):597-606                                                                                        | Excluded by title |
| 85  | Kook YA, Park JH, Kim Y, Ahn CS, Bayome M. Orthodontic Treatment of Skeletal Class II Adolescent with Anterior Open Bite using Mini-Screws and Modified Palatal Anchorage Plate. <i>J Clin Pediatr Dent.</i> 2015 Winter;39(2):187-92                                                                  | Excluded by title |
| 86  | Jiang ST, Jiang XL, Qin Y, Zhang R, Liu HJ, Jiao GJ, Yuan K. [Treating maxillary dental arch crowding and protrusion of the patient with mandibular molars missing by implanting miniscrew anchorage]. <i>Hua Xi Kou Qiang Yi Xue Za Zhi.</i> 2007 Jun;25(3):260-2                                     | Excluded by title |
| 87  | Lee HE, Lee KT, Tseng YC, Huang IY, Chen CM. Interdisciplinary management of unfavorable posterior intermaxillary space. <i>Br J Oral Maxillofac Surg.</i> 2008 Jul;46(5):413-5                                                                                                                        | Excluded by title |
| 88  | Bengi AO, Karacay S, Akin E, Olmez H, Okçu KM, Mermut S. Use of zygomatic anchors during rapid canine distalization: a preliminary case report. <i>Angle Orthod.</i> 2006 Jan;76(1):137-47                                                                                                             | Excluded by title |
| 89  | Aravind M, Shivaprakash G, Ramesh GC. Torque control in lingual orthodontics with lever arm mechanics: a case report. <i>Orthodontics (Chic.).</i> 2013;14(1):e186-96                                                                                                                                  | Excluded by title |
| 90  | Kolokitha OE, Papadopolou AK. Rapid palatal expander: an anchor unit for second molar distalization in Angle Class II treatment. <i>World J Orthod.</i> 2010 Spring;11(1):75-84                                                                                                                        | Excluded by title |
| 91  | Vital RW, da Silva Campos MJ, de Andrade Vital JC, Santiago RC, Fraga MR. Orthodontic distalization with rigid plate fixation for anchorage after bone grafting and maxillary sinus lifting. <i>Am J Orthod Dentofacial Orthop.</i> 2009 Jul;136(1):109-14                                             | Excluded by title |
| 92  | Hilgers JJ. Hyperefficient orthodontic treatment using tandem mechanics. <i>Semin Orthod.</i> 1998 Mar;4(1):17-25                                                                                                                                                                                      | Excluded by title |
| 93  | Carano A, Testa M, Siciliani G. The lingual distalizer system. <i>Eur J Orthod.</i> 1996 Oct;18(5):445-8                                                                                                                                                                                               | Excluded by title |
| 94  | Kook YA, Park JH, Kim Y, Ahn CS, Bayome M. Orthodontic Treatment of Skeletal Class II Adolescent with Anterior Open Bite using Mini-Screws and Modified Palatal Anchorage Plate. <i>J Clin Pediatr Dent.</i> 2015 Winter;39(2):187-92                                                                  | Excluded by title |
| 95  | Senişik NE, Koçer G, Kaya BÜ. Ankylosed maxillary incisor with severe root resorption treated with a single-tooth dento-osseous osteotomy, vertical alveolar distraction osteogenesis, and mini-implant anchorage. <i>Am J Orthod Dentofacial Orthop.</i> 2014 Sep;146(3):371-84                       | Excluded by title |
| 96  | Park HS, Kwon TG, Kwon OW. Treatment of open bite with microimplant anchorage. <i>Am J Orthod Dentofacial Orthop.</i> 2004 Nov;126(5):627-36                                                                                                                                                           | Excluded by title |
| 97  | Kook YA, Park JH, Kim Y, Ahn CS, Bayome M. Sagittal correction of adolescent patients with modified palatal anchorage plate appliances. <i>Am J Orthod Dentofacial Orthop.</i> 2015 Oct;148(4):674-84                                                                                                  | Excluded by title |
| 98  | Uribe F, Janakiraman N, Nanda R. Interdisciplinary approach for increasing the vertical dimension of occlusion in an adult patient with several missing teeth. <i>Am J Orthod Dentofacial Orthop.</i> 2013 Jun;143(6):867-76                                                                           | Excluded by title |
| 99  | Durgekar SG, Kumar PS, Kolar N. Rapid canine retraction with periodontal distraction in Class II division 1 malocclusion: a case report. <i>Int J Orthod Milwaukee.</i> 2012 Winter;23(4):21-7                                                                                                         | Excluded by title |
| 100 | Celli D, Gasperoni E, Pansoni P, Deli R. Uprighting of mandibular second molars with the sectional modified Loca system. <i>Orthodontics (Chic.).</i> 2013;14(1):e118-25                                                                                                                               | Excluded by title |

|     |                                                                                                                                                                                                                                                                                                        |                   |
|-----|--------------------------------------------------------------------------------------------------------------------------------------------------------------------------------------------------------------------------------------------------------------------------------------------------------|-------------------|
| 101 | Kook YA, Park JH, Bayome M, Sa'aed NL. Correction of severe bimaxillary protrusion with first premolar extractions and total arch distalization with palatal anchorage plates. <i>Am J Orthod Dentofacial Orthop.</i> 2015 Aug;148(2):310-20                                                           | Excluded by title |
| 102 | Kaku JK, Arimoto H, Sinohara N, Greenfield R. Use of Tip-Edge brackets to reduce posterior anchorage requirements after molar distalization. <i>J Clin Orthod.</i> 2004 Jun;38(6):320-4                                                                                                                | Excluded by title |
| 103 | Kofod T, Würtz V, Melsen B. Treatment of an ankylased central incisor by single tooth dento-osseous osteotomy and a simple distraction device. <i>Am J Orthod Dentofacial Orthop.</i> 2005 Jan;127(1):72-80                                                                                            | Excluded by title |
| 104 | Song F, He S, Chen S. Temporomandibular disorders with skeletal open bite treated with stabilization splint and zygomatic miniplate anchorage: a case report. <i>Angle Orthod.</i> 2015 Mar;85(2):335-47                                                                                               | Excluded by title |
| 105 | Uslu O, Erdem D. Report of a patient with a Class II occlusion using the Begg technique to move the first molars distally. <i>World J Orthod.</i> 2009 Fall;10(3):252-6                                                                                                                                | Excluded by title |
| 106 | Kook YA, Kim SH, Chung KR. A modified palatal anchorage plate for simple and efficient distalization. <i>J Clin Orthod.</i> 2010 Dec;44(12):719-30                                                                                                                                                     | Excluded by title |
| 107 | Kook YA, Lee DH, Kim SH, Chung KR. Design improvements in the modified C-palatal plate for molar distalization. <i>J Clin Orthod.</i> 2013 Apr;47(4):241-8                                                                                                                                             | Excluded by title |
| 108 | Hendrickx K, Mommaerts MY, Jacobs W, Abeloos JV, Neyt LF, De Clercq CA. Proximal segment position after distraction with the MD-DOS device. <i>J Craniomaxillofac Surg.</i> 1999 Dec;27(6):383-6                                                                                                       | Excluded by title |
| 109 | Irezli, E. C., & Baysal, A. Changes in the craniofacial structures and esthetic perceptions of soft-tissue profile alterations after distalization and Herbst appliance treatment. <i>Am J Orthod Dentofacial Orthop.</i> 2021 March;159(3): 292–304.                                                  | Excluded by title |
| 110 | Batista KBSL, Thiruvengkatchari B, Harrison JE, O'Brien KD. Orthodontic treatment for prominent upper front teeth (Class II malocclusion) in children and adolescents. <i>Cochrane Database of Systematic Reviews</i> 2018, Issue 3. Art. No.: CD003452                                                | Excluded by title |
| 111 | Jambi S, Walsh T, Sandler J, Benson PE, Skeggs RM, O'Brien KD. Reinforcement of anchorage during orthodontic brace treatment with implants or other surgical methods. <i>Cochrane Database of Systematic Reviews</i> 2014, Issue 8. Art. No.: CD005098                                                 | Excluded by title |
| 112 | Ugolini A, Agostino P, Silvestrini-Biavati A, Harrison JE, Batista KBSL. Orthodontic treatment for posterior crossbites. <i>Cochrane Database of Systematic Reviews</i> 2021, Issue 12. Art. No.: CD000979                                                                                             | Excluded by title |
| 113 | Marthinus Johannes Coetsee Jnr I and Marthinus Johannes Coetsee Snr. Unilateral Class II treatment using fixed orthodontic appliances with open coil spring, sliding hook and light Class II elastics. <i>International Dent-African edition</i> ;10(4):18-30.                                         | Excluded by title |
| 114 | Benson PE, Atwal A, Bazargani F, Parkin N, Thind B. Interventions for promoting the eruption of palatally displaced permanent canine teeth, without the need for surgical exposure, in children aged 9 to 14 years. <i>Cochrane Database of Systematic Reviews</i> 2021, Issue 12. Art. No.: CD012851  | Excluded by title |
| 115 | Turner S, Harrison JE, Sharif FNI, Owens D, Millett DT. Orthodontic treatment for crowded teeth in children. <i>Cochrane Database of Systematic Reviews</i> 2021, Issue 12. Art. No.: CD003453                                                                                                         | Excluded by title |
| 116 | Ghaemini H, Nienhuijs MEL, Toedtling V, Perry J, Tummers M, Hoppenreijts TJM, Van der Sanden WJM, Mettes TG. Surgical removal versus retention for the management of asymptomatic disease-free impacted wisdom teeth. <i>Cochrane Database of Systematic Reviews</i> 2020, Issue 5. Art. No.: CD003879 | Excluded by title |
| 117 | Millett DT, Mandall NA, Mattick RCR, Hickman J, Glenn AM. Adhesives for bonded molar tubes during fixed brace treatment. <i>Cochrane Database of Systematic Reviews</i> 2017, Issue 2. Art. No.: CD008236                                                                                              | Excluded by title |
| 118 | Fleming PS, Fedorowicz Z, Johal A, El-Angbawi A, Pandis N. Surgical adjunctive procedures for accelerating orthodontic treatment. <i>Cochrane Database of Systematic Reviews</i> 2015, Issue 6. Art. No.: CD010572                                                                                     | Excluded by title |
| 119 | Parkin N, Benson PE, Thind B, Shah A, Khalil I, Ghafoor S. Open versus closed surgical exposure of canine teeth that are displaced in the roof of the mouth. <i>Cochrane Database of Systematic Reviews</i> 2017, Issue 8. Art. No.: CD006966                                                          | Excluded by title |
| 120 | Lentini-Oliveira DA, Carvalho FR, Rodrigues CG, Ye Q, Hu R, Minami-Sugaya H, Carvalho LBC, Prado LBF, Prado GF. Orthodontic and orthopaedic treatment for anterior open bite in children. <i>Cochrane Database of Systematic Reviews</i> 2014, Issue 9. Art. No.: CD005515                             | Excluded by title |
| 121 | Borrie FRP, Bearn DR, Innes NPT, Iheozor-Ejiofor Z. Interventions for the cessation of non-nutritive sucking habits in children. <i>Cochrane Database of Systematic Reviews</i> 2015, Issue 3. Art. No.: CD008694                                                                                      | Excluded by title |
| 122 | Wang Y, Liu C, Jian F, McIntyre GT, Millett DT, Hickman J, Lai W. Initial arch wires used in orthodontic treatment with fixed appliances. <i>Cochrane Database of Systematic Reviews</i> 2018, Issue 7. Art. No.: CD007859                                                                             | Excluded by title |
| 123 | Yu Y, Sun J, Lai W, Wu T, Koshy S, Shi Z. Interventions for managing relapse of the lower front teeth after orthodontic treatment. <i>Cochrane Database of Systematic Reviews</i> 2013, Issue 9. Art. No.: CD008734                                                                                    | Excluded by title |
| 124 | Benson PE, Parkin N, Dyer F, Millett DT, Germain P. Fluorides for preventing early tooth decay (demineralised lesions) during fixed brace treatment. <i>Cochrane Database of Systematic Reviews</i> 2019, Issue 11. Art. No.: CD003809                                                                 | Excluded by title |
| 125 | El-Angbawi A, McIntyre GT, Fleming PS, Bearn DR. Non-surgical adjunctive interventions for accelerating tooth movement in patients undergoing fixed orthodontic treatment. <i>Cochrane Database of Systematic Reviews</i> 2015, Issue 11. Art. No.: CD010887                                           | Excluded by title |
| 126 | Guo J, Li C, Zhang Q, Wu G, Deacon SA, Chen J, Hu H, Zou S, Ye Q. Secondary bone grafting for alveolar cleft in children with cleft lip or cleft lip and palate. <i>Cochrane Database of Systematic Reviews</i> 2011, Issue 6. Art. No.: CD008050                                                      | Excluded by title |
| 127 | Lim HJ, Kim Y, Park JH, Lee NK, Kim KB, Kook YA. Cephalometric and model evaluations after molar distalization using modified C-palatal plates in patients with severe arch length discrepancy. <i>Am J Orthod Dentofacial Orthop.</i> 2022 Sep 15:S0889-5406(22)00518-2                               | Excluded by title |
| 128 | Greco M, Rossini G, Rombolà A. G-Block: Posterior anchorage device tads-supported after molar distalization with aligners: An adult case report. <i>Int Orthod.</i> 2022 Sep 21:100687.                                                                                                                | Excluded by title |
| 129 | Catalfamo L, Gasperoni E, Celli D. Smart distalization of the upper arch with an easy, efficient and no-compliance procedure. <i>J Orthod.</i> 2022 Sep;49(3):304-315.                                                                                                                                 | Excluded by title |

|     |                                                                                                                                                                                                                                                                                                                                                                                         |                      |
|-----|-----------------------------------------------------------------------------------------------------------------------------------------------------------------------------------------------------------------------------------------------------------------------------------------------------------------------------------------------------------------------------------------|----------------------|
| 130 | Lorente C, Lorente P, Perez-Vela M, Esquinas C, Lorente T. Treatment of impacted or retained second molars with the miniscrew-supported pole technique: a prospective follow-up study. <i>Prog Orthod.</i> 2022 Oct 10;23(1):36.                                                                                                                                                        | Excluded by title    |
| 131 | Mazhari M, Khanehmajedi M, Mazhary M, Atashkar N, Rakhshan V. Dynamics, Efficacies, and Adverse Effects of Maxillary Full-Arch Intrusion Using Temporary Anchorage Devices (Miniscrews): A Finite Element Analysis. <i>Biomed Res Int.</i> 2022 Oct 7;2022:6706392.                                                                                                                     | Excluded by title    |
| 132 | Negrisoni S, Angelieri F, Gonçalves JR, da Silva HDP, Maltaçliati LÁ, Raphaelli Nahás-Scocate AC. Assessment of the bone thickness of the palate on cone-beam computed tomography for placement of miniscrew-assisted rapid palatal expansion appliances. <i>Am J Orthod Dentofacial Orthop.</i> 2022 Jun;161(6):849-857.                                                               | Excluded by title    |
| 133 | Cheng XY, Sang T, Wu J. [Cone-beam CT evaluation of the effect of indirect anchorage of mini-screw assisted clear aligner on molar distalization]. <i>Zhonghua Kou Qiang Yi Xue Za Zhi.</i> 2022 Jul 2;57(7):724-732. Chinese.                                                                                                                                                          | Excluded by title    |
| 134 | Castaldo A. Distalizzazione dei molari superiori: un nuovo approccio (biomeccanica) [Distalization of upper molars: a new approach (biomechanical)]. <i>Mondo Ortod.</i> 1991 Mar-Apr;16(2):157-61                                                                                                                                                                                      | Excluded by abstract |
| 135 | Bolla E, Doldo T, Giorgetti R. Distal movement of maxillary canines and premolars with sectional mechanics following Distal Jet application to molars. <i>Prog Orthod.</i> 2004;5:72-89                                                                                                                                                                                                 | Excluded by abstract |
| 136 | Pernier CM, Challe EJ, Gebeile-Chauty SM, Akin JJ. Traitements interceptifs de la classe II en denture mixte: thérapeutiques intra-orales de distalisation [Class II interceptive therapy in the mixed dentition: intra-oral distalization appliances]. <i>Orthod Fr.</i> 2006 Mar;77(1):139-49                                                                                         | Excluded by abstract |
| 137 | Thiruvengkatchari B, Ammayappan P, Kandaswamy R. Comparison of rate of canine retraction with conventional molar anchorage and titanium implant anchorage. <i>Am J Orthod Dentofacial Orthop.</i> 2008 Jul;134(1):30-5                                                                                                                                                                  | Excluded by abstract |
| 138 | Su H, Han B, Li S, Na B, Ma W, Xu TM. Factors predisposing to maxillary anchorage loss: a retrospective study of 1403 cases. <i>PLoS One.</i> 2014 Oct 9;9(10):e109561                                                                                                                                                                                                                  | Excluded by abstract |
| 139 | Sodagar A, Ahmad Akhouni MS, Rafighi A, Arab S. Fabrication and evaluation of a noncompliant molar distalizing appliance: bonded molar distalizer. <i>J Dent (Tehran).</i> 2011 Summer;8(3):107-16                                                                                                                                                                                      | Excluded by abstract |
| 140 | Fontana M, Cozzani M, Mutinelli S, Spena R, Caprioglio A. Maxillary molar distalization therapy in adult patients: a multicentre study. <i>Orthod Craniofac Res.</i> 2015 Nov;18(4):221-31                                                                                                                                                                                              | Excluded by abstract |
| 141 | Yu JJ, Kook YA, Sung SJ, Lee KJ, Chun YS, Mo SS. Comparison of tooth displacement between buccal mini-implants and palatal plate anchorage for molar distalization: a finite element study. <i>Eur J Orthod.</i> 2014 Aug;36(4):394-402                                                                                                                                                 | Excluded by abstract |
| 142 | Cassetta M, Altieri F, Guarnieri R, Padelino G, Mezio M, Barbato E. Palatal miniscrew insertion using a CAD/CAM surgical guide: A clinical case. <i>Dental Cadmos</i> 2020 Dec; 88(10):691-699.                                                                                                                                                                                         | Excluded by abstract |
| 143 | Khlef HN, Hajeer MY, Ajaj MA, Heshmeh O, Youssef N, Mahaini L. The effectiveness of traditional corticotomy vs flapless corticotomy in miniscrew-supported en-masse retraction of maxillary anterior teeth in patients with Class II Division 1 malocclusion: A single-centered, randomized controlled clinical trial. <i>Am J Orthod Dentofacial Orthop.</i> 2020 Dec;158(6):e111-e120 | Excluded by abstract |
| 144 | Beyling F, Klang E, Niehoff E, Schwestka-Polly R, Helms HJ, Wiechmann D. Class II correction by maxillary en masse distalization using a completely customized lingual appliance and a novel mini-screw anchorage concept - preliminary results. <i>Head Face Med.</i> 2021 Jun 29;17(1):23                                                                                             | Excluded by abstract |
| 145 | Papadopoulos MA. Efficient Distalization of Maxillary Molars with Temporary Anchorage Devices for the Treatment of Class II Malocclusion. <i>Turk J Orthod.</i> 2020 Aug 20;33(3):197-201                                                                                                                                                                                               | Excluded by abstract |
| 146 | Karlsson I, Bondemark L. Intraoral maxillary molar distalization. <i>Angle Orthod.</i> 2006 Nov;76(6):923-9                                                                                                                                                                                                                                                                             | Excluded by abstract |
| 147 | Onçağ G, Seçkin O, Dinçer B, Arikan F. Osseointegrated implants with pendulum springs for maxillary molar distalization: a cephalometric study. <i>Am J Orthod Dentofacial Orthop.</i> 2007 Jan;131(1):16-26                                                                                                                                                                            | Excluded by abstract |
| 148 | Caprioglio A, Beretta M, Lanteri C. Maxillary molar distalization: Pendulum and Fast-Back, comparison between two approaches for Class II malocclusion. <i>Prog Orthod.</i> 2011;12(1):8-16                                                                                                                                                                                             | Excluded by abstract |
| 149 | Papadopoulos MA, Melkos AB, Athanasiou AE. Noncompliance maxillary molar distalization with the first class appliance: a randomized controlled trial. <i>Am J Orthod Dentofacial Orthop.</i> 2010 May;137(5):586.e1-586.e13; discussion 586-7                                                                                                                                           | Excluded by abstract |
| 150 | Alkasaby AA, Abdelnaby YL, Hammad SM. Effects of molar distalization with the fast back appliance. <i>Int J Orthod Milwaukee.</i> 2013 Winter;24(4):25-31                                                                                                                                                                                                                               | Excluded by abstract |
| 151 | Mavropoulos A, Sayinsu K, Allaf F, Kiliaridis S, Papadopoulos MA, Keles AO. Noncompliance unilateral maxillary molar distalization: <i>Angle Orthod.</i> 2006 May;76(3):382-7                                                                                                                                                                                                           | Excluded by abstract |
| 152 | Park JH, Kim S, Lee YJ, Bayome M, Kook YA, Hong M, Kim Y. Three-dimensional evaluation of maxillary dentoalveolar changes and airway space after distalization in adults. <i>Angle Orthod.</i> 2018 Mar;88(2):187-194                                                                                                                                                                   | Excluded by abstract |
| 153 | Kilkis D, Celikoglu M, Nur M, Bayram M, Candirli C. Effects of zygoma-gear appliance for unilateral maxillary molar distalization: A prospective clinical study. <i>Am J Orthod Dentofacial Orthop.</i> 2016 Dec;150(6):989-996                                                                                                                                                         | Excluded by abstract |
| 154 | Maino G, Mariani L, Bozzo I, Maino G, Caprioglio A. Maxillary molar distalization with MGBM-system in class II malocclusion. <i>J Orthod Sci.</i> 2013 Jul;2(3):101-8                                                                                                                                                                                                                   | Excluded by abstract |
| 155 | Amasyali M, Sabuncuoğlu FA, Oflaz U. Intraoral Molar Distalization with Intraosseous Mini Screw. <i>Turk J Orthod.</i> 2018 Mar;31(1):26-30                                                                                                                                                                                                                                             | Excluded by abstract |
| 156 | Kinzing G, Wehrbein H, Byloff FK, Yildizhan F, Diedrich P. Innovative anchorage alternatives for molar distalization--an overview. <i>J Orofac Orthop.</i> 2005 Sep;66(5):397-413                                                                                                                                                                                                       | Excluded by abstract |
| 157 | Lombardo L, Occhiuto G, Paoletto E, Maino BG, Siciliani G. Class II treatment by palatal miniscrew-system appliance: A case report. <i>Angle Orthod.</i> 2020 Mar;90(2):305-313                                                                                                                                                                                                         | Excluded by abstract |
| 158 | Shaikh A, Jamdar AF, Galgali SA, Patil S, Patel I, Hemagiriappa MS. Efficacy of Infrazygomatic Crest Implants for Full-arch Distalization of Maxilla and Reduction of Gummy Smile in Class II Malocclusion. <i>J Contemp Dent Pract.</i> 2021 Oct 1;22(10):1135-1143                                                                                                                    | Excluded by abstract |
| 159 | Al-Thomali Y, Basha S, Mohamed RN. Pendulum and modified pendulum appliances for maxillary molar distalization in Class II malocclusion - a systematic review. <i>Acta Odontol Scand.</i> 2017 Aug;75(6):394-401                                                                                                                                                                        | Excluded by abstract |

|     |                                                                                                                                                                                                                                                                                                                                                        |                      |
|-----|--------------------------------------------------------------------------------------------------------------------------------------------------------------------------------------------------------------------------------------------------------------------------------------------------------------------------------------------------------|----------------------|
| 160 | Nur M, Bayram M, Celikoglu M, Kilkis D, Pampu AA. Effects of maxillary molar distalization with Zygoma-Gear Appliance. <i>Angle Orthod.</i> 2012 Jul;82(4):596-602                                                                                                                                                                                     | Excluded by abstract |
| 161 | S. Jay Bowman. Reprint of: Uno, dos, tres: One concept for three angle classes. <i>Seminars in Orthodontics</i> 2021 March; 27(1): 15-24.                                                                                                                                                                                                              | Excluded by abstract |
| 162 | Liu H, Wu X, Yang L, Ding Y. Safe zones for miniscrews in maxillary dentition distalization assessed with cone-beam computed tomography. <i>Am J Orthod Dentofacial Orthop.</i> 2017 Mar;151(3):500-506                                                                                                                                                | Excluded by abstract |
| 163 | Lee JY. Distalisation des molaires utilisant des mini-vis d'ancrage placées verticalement [Molar distalization by using vertically installed mini-screws]. <i>Orthod Fr.</i> 2012 Dec;83(4):257-66                                                                                                                                                     | Excluded by abstract |
| 164 | Farret MM, Farret MM. Class II malocclusion with accentuated occlusal plane inclination corrected with miniplate: a case report. <i>Dental Press J Orthod.</i> 2016 Jun;21(3):94-103                                                                                                                                                                   | Excluded by abstract |
| 165 | Palone M, Baciliero M, Cervinara F, Maino GB, Paoletto E, Cremonini F, Lombardo L. Class II treatment of transverse maxillary deficiency with a single bone-borne appliance and hybrid clear aligner approach in an adult patient: A case report. <i>J World Fed Orthod.</i> 2022 Apr;11(2):80-94.                                                     | Excluded by abstract |
| 166 | Suzuki EY, Suzuki B. Maxillary molar distalization with the indirect Palatal miniscrew for Anchorage and Distalization Appliance (iPANDA). <i>Orthodontics (Chic.).</i> 2013;14(1):e228-41                                                                                                                                                             | Excluded by abstract |
| 167 | Pattabiraman V, Kumari S, Sood R. Mini-implant-supported sliding jig. <i>Orthodontics (Chic.).</i> 2011 Winter;12(4):396-9                                                                                                                                                                                                                             | Excluded by abstract |
| 168 | Alfaifi M, Park JH, Tai K, Ku JH, Vaid NR, Kook YA, Shoaib AM, Bayome M. Comparison of Treatment Effects with Modified C-Palatal Plates vs Greenfield Molar Distalizer Appliances in Adolescents. <i>J Clin Pediatr Dent.</i> 2020;44(3):202-208                                                                                                       | Excluded by abstract |
| 169 | Kaya B, Sar C, Arman-Özçirpici A, Polat-Özsoy O. Palatal implant versus zygoma plate anchorage for distalization of maxillary posterior teeth. <i>Eur J Orthod.</i> 2013 Aug;35(4):507-14                                                                                                                                                              | Excluded by abstract |
| 170 | Uçem TT, Yüksel S, Okay C, Gülşen A. Effects of a three-dimensional bimetric maxillary distalizing arch. <i>Eur J Orthod.</i> 2000 Jun;22(3):293-8                                                                                                                                                                                                     | Excluded by abstract |
| 171 | Joanna Antoszewska, Nazan Küçükkeles. Biomechanics of Tooth-Movement: Current Look at Orthodontic Fundamental, Principles in Contemporary Orthodontics, Dr. Silvano Naretto (Ed.) 2011.                                                                                                                                                                | Excluded by abstract |
| 172 | Mavropoulos A, Karamouzou A, Kiliaridis S, Papadopoulos MA. Efficiency of noncompliance simultaneous first and second upper molar distalization: a three-dimensional tooth movement analysis. <i>Angle Orthod.</i> 2005 Jul;75(4):532-9                                                                                                                | Excluded by abstract |
| 173 | Bondemark L, Karlsson I. Extraoral vs intraoral appliance for distal movement of maxillary first molars: a randomized controlled trial. <i>Angle Orthod.</i> 2005 Sep;75(5):699-706                                                                                                                                                                    | Excluded by abstract |
| 174 | Pernier C, Cresseaux P. Préparation orthodontique préchirurgicale des classes II squelettiques au moyen d'un ancrage osseux par fil d'ostéosynthèse : à propos d'un cas [Presurgical orthodontic preparation of skeletal Class II by means of a bone anchorage with an osteosynthesis wire: a clinical case]. <i>Orthod Fr.</i> 2021 Mar 1;92(1):17-28 | Excluded by abstract |
| 175 | Chiu PP, McNamara JA Jr, Franchi L. A comparison of two intraoral molar distalization appliances: distal jet versus pendulum. <i>Am J Orthod Dentofacial Orthop.</i> 2005 Sep;128(3):353-65                                                                                                                                                            | Excluded by abstract |
| 176 | N.R. Krishnaswamy. Vertical control with TADs: Procedures and protocols. <i>Seminars in Orthodontics</i> 2018 March; 24(1):108-122.                                                                                                                                                                                                                    | Excluded by abstract |
| 177 | Akış H, Doruk C. Dentofacial Effects of Fixed Functional Appliances with or without Mini Screw Anchorage in the Treatment of Class II Division I Malocclusion: A Finite Element Analysis. <i>Turk J Orthod.</i> 2018 Mar;31(1):7-12                                                                                                                    | Excluded by abstract |
| 178 | Naish, Hywel J, Dunbar Claire, Atack Nikki E, Williams, Julie C Sandy, Jonathan R Ireland Anthony J. The control of unwanted tooth movement — an overview of orthodontic anchorage. <i>Orthodontic Update</i> 2015 Sept;8(2):42–54.                                                                                                                    | Excluded by abstract |
| 179 | Tripathi T, Rai P, Singh N. Molar distalization with 2K appliance: one-year follow-up. <i>J Orthod Sci.</i> 2017 Jul-Sep;6(3):97-103                                                                                                                                                                                                                   | Excluded by abstract |
| 180 | El-Dawlatly MM, Abou-El-Ezz AM, El-Sharaby FA, Mostafa YA. Zygomatic mini-implant for Class II correction in growing patients. <i>J Orofac Orthop.</i> 2014 May;75(3):213-25                                                                                                                                                                           | Excluded by abstract |
| 181 | Sa'ed NL, Park CO, Bayome M, Park JH, Kim Y, Kook YA. Skeletal and dental effects of molar distalization using a modified palatal anchorage plate in adolescents. <i>Angle Orthod.</i> 2015 Jul;85(4):657-64                                                                                                                                           | Excluded by abstract |
| 182 | Lee SK, Abbas NH, Bayome M, Baik UB, Kook YA, Hong M, Park JH. A comparison of treatment effects of total arch distalization using modified C-palatal plate vs buccal miniscrews. <i>Angle Orthod.</i> 2018 Jan;88(1):45-51                                                                                                                            | Excluded by abstract |
| 183 | Byloff FK, Darendeliler MA, Clar E, Darendeliler A. Distal molar movement using the pendulum appliance. Part 2: The effects of maxillary molar root uprighting bends. <i>Angle Orthod.</i> 1997;67(4):261-70                                                                                                                                           | Excluded by abstract |
| 184 | Palencar AJ. Molar distalization with the assistance of Temporary Anchorage Devices. <i>Int J Orthod Milwaukee.</i> 2015 Spring;26(1):11-6                                                                                                                                                                                                             | Excluded by abstract |
| 185 | Papadopoulos MA. Orthodontic treatment of Class II malocclusion with miniscrew implants. <i>Am J Orthod Dentofacial Orthop.</i> 2008 Nov;134(5):604.e1-16; discussion 604-5                                                                                                                                                                            | Excluded by abstract |
| 186 | Jamwal RS, Doshi UH, Bhad WA. Comparison of sagittal anchorage conservation of mini-implants and modified Nance palatal buttons. <i>Orthodontics (Chic.).</i> 2012;13(1):e10-9                                                                                                                                                                         | Excluded by abstract |
| 187 | Zhou Y, Huang MF, Fang ZX, Chen SW, Ou XL. [Treatment of skeletal Class II adult patients with microcrew implant anchorage and multi-loop edgewise arch wire]. <i>Zhonghua Kou Qiang Yi Xue Za Zhi.</i> 2008 Aug;43(8):472-5                                                                                                                           | Excluded by abstract |
| 188 | Maino BG, Gianelly AA, Bednar J, Mura P, Maino G. MGBM system: new protocol for Class II non extraction treatment without cooperation. <i>Prog Orthod.</i> 2007;8(1):130-43                                                                                                                                                                            | Excluded by abstract |
| 189 | Hong RK, Ahn JH. Correction of a gummy smile and lip protrusion by orthodontic retreatment with lingual appliances and temporary skeletal anchorage devices. <i>Am J Orthod Dentofacial Orthop.</i> 2021 Oct;160(4):603-616                                                                                                                            | Excluded by abstract |
| 190 | Marure PS, Patil RU, Reddy S, Prakash A, Kshetrimayum N, Shukla R. The effectiveness of pendulum, K-loop, and distal jet distalization techniques in growing children and its effects on anchor unit: A comparative study. <i>J Indian Soc Pedod Prev Dent.</i> 2016 Oct-Dec;34(4):331-40                                                              | Excluded by abstract |



|     |                                                                                                                                                                                                                                                                        |                       |
|-----|------------------------------------------------------------------------------------------------------------------------------------------------------------------------------------------------------------------------------------------------------------------------|-----------------------|
| 191 | Upadhyay M, Yadav S, Nagaraj K, Uribe F, Nanda R. Mini-implants vs fixed functional appliances for treatment of young adult Class II female patients: a prospective clinical trial. <i>Angle Orthod.</i> 2012 Mar;82(2):294-303                                        | Excluded by abstract  |
| 192 | Young-Chel Park, Nak-Chun Choi, Yoon-Jeong Choi, Jong-Suk Lee, Hyoen-Shik Hwang. Déplacement distal des molaires supérieures à l'aide d'implants mini-vis. <i>Rev Orthop Dento Faciale</i> 2006;40 (1):93-110                                                          | Excluded by abstract  |
| 193 | Gurgel Jde A, Pinzan-Vercelino CR, Bramante FS, Rivera AP. Distalization of maxillary molars using a lever arm and mini-implant. <i>Orthodontics (Chic.)</i> . 2013;14(1):e140-9                                                                                       | Excluded by abstract  |
| 194 | Kayalar E, Batu-Guney A, Marsan G, Firatli S. Consecutive use of mini-implants in the palate to treat skeletal maxillary constriction and Class II malocclusion in an adult case. <i>Niger J Clin Pract.</i> 2020 Nov;23(11):1624-1627                                 | Excluded by abstract  |
| 195 | Upadhyay M, Yadav S, Patil S. Mini-implant anchorage for en-masse retraction of maxillary anterior teeth: a clinical cephalometric study. <i>Am J Orthod Dentofacial Orthop.</i> 2008 Dec;134(6):803-10                                                                | Excluded by abstract  |
| 196 | Eissa O, El-Shennawy M, Gaballah S, El-Meehy G, El Bialy T. Treatment outcomes of Class II malocclusion cases treated with miniscrew-anchored Forsus Fatigue Resistant Device: A randomized controlled trial. <i>Angle Orthod.</i> 2017 Nov;87(6):824-833              | Excluded by abstract  |
| 197 | Upadhyay M, Yadav S, Nagaraj K, Nanda R. Dentoskeletal and soft tissue effects of mini-implants in Class II division 1 patients. <i>Angle Orthod.</i> 2009 Mar;79(2):240-7                                                                                             | Excluded by abstract  |
| 198 | V Zymperdikas, M Papadopoulos. Contemporary applications of orthodontic miniscrew implants for the treatment of Class II malocclusion. <i>Hell Orthod Rev</i> 2012;15(1&2):15-61.                                                                                      | Excluded by abstract  |
| 199 | Polat-Ozsoy O, Gokcelik A, Güngör-Acar A, Kircelli BH. Soft tissue profile after distal molar movement with a pendulum K-loop appliance versus cervical headgear. <i>Angle Orthod.</i> 2008 Mar;78(2):317-23                                                           | Excluded by abstract  |
| 200 | Sanap S, Swami V, Patil A, Deshmukh, S, Bhosale V. Evaluation of Efficacy of Various Implants in Maxillary Arch Distalization - A Finite Element Analysis. <i>Orthodontic Journal of Nepal</i> 2020. 10(1):44-54.                                                      | Excluded by abstract  |
| 201 | Fontana M, Cozzani M, Caprioglio A. Soft tissue, skeletal and dentoalveolar changes following conventional anchorage molar distalization therapy in class II non-growing subjects: a multicentric retrospective study. <i>Prog Orthod.</i> 2012 May;13(1):30-41        | Excluded by abstract  |
| 202 | Byloff FK, Darendeliler MA, Clar E, Darendeliler A. Distal molar movement using the pendulum appliance. Part 2: The effects of maxillary molar root uprighting bends. <i>Angle Orthod.</i> 1997;67(4):261-70                                                           | Excluded by abstract  |
| 203 | Bolla E, Muratore F, Carano A, Bowman SJ. Evaluation of maxillary molar distalization with the distal jet: a comparison with other contemporary methods. <i>Angle Orthod.</i> 2002 Oct;72(5):481-94                                                                    | Excluded by abstract  |
| 204 | Ba-Yazed AH, Hafez AM, El-Bialy AA. Dento-skeletal effects of the Pendulum Hygienic Distalizer. <i>Int J Orthod Milwaukee.</i> 2014 Winter;25(4):21-5                                                                                                                  | Excluded by abstract  |
| 205 | Su H, Han B, Li S, Na B, Ma W, Xu TM. Compensation trends of the angulation of first molars: retrospective study of 1403 malocclusion cases. <i>Int J Oral Sci.</i> 2014 Sep;6(3):175-81                                                                               | Excluded by abstract  |
| 206 | Ngantung V, Nanda RS, Bowman SJ. Posttreatment evaluation of the distal jet appliance. <i>Am J Orthod Dentofacial Orthop.</i> 2001 Aug;120(2):178-85                                                                                                                   | Excluded by abstract  |
| 207 | Angelieri F, Almeida RR, Almeida MR, Fuziy A. Dentoalveolar and skeletal changes associated with the pendulum appliance followed by fixed orthodontic treatment. <i>Am J Orthod Dentofacial Orthop.</i> 2006 Apr;129(4):520-7                                          | Excluded by abstract  |
| 208 | Caprioglio A, Cozzani M, Fontana M. Comparative evaluation of molar distalization therapy with erupted second molar: Segmented versus Quad Pendulum appliance. <i>Prog Orthod.</i> 2014;15(1):49                                                                       | Excluded by abstract  |
| 209 | Wang Z, Huang C, Zhou H, Liu Z. [A comparative study of clinical application of two types appliances for maxillary molar distalization]. <i>Hua Xi Kou Qiang Yi Xue Za Zhi.</i> 2001 Oct;19(5):309-11                                                                  | Excluded by abstract  |
| 210 | Nishii Y, Sameshima GT, Tachiki C. Digital Photoelastic Analysis of TAD-Supported Maxillary Arch Distalization. <i>Applied Sciences.</i> 2022 Feb; 12(4):1949.                                                                                                         | Excluded by abstract  |
| 211 | PEREIRA, Silvio Augusto Bellini. Three-dimensional evaluation of the maxillary dentoalveolar changes with three different intraoral distalization systems: Jones Jig, Distal Jet and First, 2018. Master's Dissertation in Ortodontia e Odontologia em Saúde Coletiva. | Excluded by abstract  |
| 212 | Sırman SSH, Özcan M, Tozlu M. Treatment of a Class II Case with Palatally Inserted Distalization Mechanics in an Epilepsy Patient. <i>Turk J Orthod.</i> 2017 Jun;30(2):61-68                                                                                          | Excluded by abstract  |
| 213 | Sidiropoulou S, Chatzigianni A. The 'SOS activator': A Novel Functional Device Combined with Fixed Appliances for the Correction of Class II Malocclusion. <i>Int J Orthod Milwaukee.</i> 2016 Autumn;27(3):33-38                                                      | Excluded by abstract  |
| 214 | Keles A, Sayinsu K. A new approach in maxillary molar distalization: intraoral bodily molar distalizer. <i>Am J Orthod Dentofacial Orthop.</i> 2000 Jan;117(1):39-48                                                                                                   | Excluded; by abstract |
| 215 | Kinzinger G, Savvaidis S, Gülden N, Ludwig B, Knösel M, Lisson J. Effects of two different functional appliances on root development of posterior teeth: activator vs. bite-jumping appliance. <i>J Orofac Orthop.</i> 2010 May;71(3):235-45                           | Excluded by abstract  |
| 216 | Castaldo A, Blasi S, Piano S, Gianelly A. Distalizzazione dei molari superiori: un nuovo approccio (ricerca clinica) [Distalization of upper molars: a new approach (clinical research)]. <i>Mondo Ortod.</i> 1991 Mar-Apr;16(2):163-9                                 | Excluded by abstract  |
| 217 | Suzuki SS, Previdente LH, Garcez AS, Suzuki H. Camouflage treatment of severe bialveolar protrusion in skeletal Class II using miniscrew anchorage. <i>Int J Orthod Milwaukee.</i> 2013 Spring;24(1):51-5                                                              | Excluded by abstract  |
| 218 | Palencar AJ. Distalization of maxillary molars with Modified Greenfield Appliance and Modified Nance Appliance as applied to specific case. <i>Int J Orthod Milwaukee.</i> 2006 Fall;17(3):41-6                                                                        | Excluded by abstract  |
| 219 | Bowman SJ. The Horseshoe Jet for miniscrew-supported molar distalization. <i>J Clin Orthod.</i> 2018 Apr;52(4):196-218                                                                                                                                                 | Excluded by abstract  |
| 220 | Oncağ G, Akyalçın S, Arıkan F. The effectiveness of a single osteointegrated implant combined with pendulum springs for molar distalization. <i>Am J Orthod Dentofacial Orthop.</i> 2007 Feb;131(2):277-84                                                             | Excluded by abstract  |
| 221 | Güray E, Ucar FI, Gul N. Distalization with the miniscrew-supported EZ Slider auxiliary. <i>J Clin Orthod.</i> 2014 Apr;48(4):238-47                                                                                                                                   | Excluded by abstract  |



|     |                                                                                                                                                                                                                                                                                                                                |                        |
|-----|--------------------------------------------------------------------------------------------------------------------------------------------------------------------------------------------------------------------------------------------------------------------------------------------------------------------------------|------------------------|
| 222 | Papadopoulos, Moschos A. The “Advanced Molar Distalization Appliance”: A Novel Approach to Correct Class II Malocclusion. Recent Patents on Biomedical Engineering 2010 January; 3(10): 6-15.                                                                                                                                  | Excluded by abstract   |
| 223 | Mohammed Almuzian, Fahad Alharbi, Jill White, Grant McIntyre. Distalizing maxillary molars – how do you do it? Orthodontic Update 2016 April; 9(2): 42-50.                                                                                                                                                                     | Excluded by abstract   |
| 224 | Bowman SJ. Upper-Molar Distalization and the Distal Jet. J Clin Orthod. 2016 Mar;50(3):159-69                                                                                                                                                                                                                                  | Excluded by abstract   |
| 225 | Anasart, Kornkamol; Pattarahirun, Atinun; Suzuki, Eduardo Yugo; Suzuki, Boonsiva; Sukjamsri, Chamaiporn (2019). Comparison of Molar Distalization Devices in a Treatment of Malocclusion Class II . Proceedings of the 2019 9th International Conference on Biomedical Engineering and Technology - ICBET 2019 March; 229–234. | Excluded by abstract   |
| 226 | Natalya Chukhray, Katarzyna Jasinska. Comparative analysis of the intraoral appliances for distalization of the upper molars. Modern Science 2018; 6: 138-148.                                                                                                                                                                 | Excluded by abstract   |
| 227 | Kinzinger GSM, Hourfar J, Lisson JA. Efficiency of the skeletonized Pendulum K appliance for non-compliance maxillary molar distalization : A clinical pilot study. J Orofac Orthop. 2021 Nov;82(6):391-402.                                                                                                                   | Excluded by abstract   |
| 228 | Park, Jae Hyun. Palatal and Ramal Plate Applications. In Temporary Anchorage Devices in Clinical Orthodontics, First Edition 2020:467–475.                                                                                                                                                                                     | Excluded by abstract   |
| 229 | Kholod El-Bady Mahmoud El-Ashry, Maher Abd El-Salam Mohammad Fouda, Ahmad Mohammad Hafez. Maxillary molars distalization: a review. Mansoura Journal of Dentistry 2020 Sept;7(27):63-65.                                                                                                                                       | Excluded by abstract   |
| 230 | Perinetti, Giuseppe, Alex Bruno, Paolo Tonini. Maxillary distalization by a rearrangement of the Leaf Expander® screw combined with palatal miniscrews: A case report on the MaXimo Appliance. South Eur J Orthod Dentofac Res 2019 Oct;6(2):40-44.                                                                            | Excluded by abstract   |
| 231 | Ferguson DJ, Carano A, Bowman SJ, Davis EC, Gutierrez Vega ME, Lee SH. A comparison of two maxillary molar distalizing appliances with the distal jet. World J Orthod. 2005 Winter;6(4):382-90                                                                                                                                 | Excluded by abstract   |
| 232 | Aliaga-Del Castillo A, Soldevilla L, Valerio MV, Bellini-Pereira SA, Vilanova L, Arriola-Guillén LE, Janson G. Class II malocclusion treatment with a customized dual force distalizer. Am J Orthod Dentofacial Orthop. 2021 Nov;160(5):743-756                                                                                | Excluded by abstract   |
| 233 | Ali D, Mohammed H, Koo SH, Kang KH, Kim SC. Three-dimensional evaluation of tooth movement in Class II malocclusions treated without extraction by orthodontic mini-implant anchorage. Korean J Orthod. 2016 Sep;46(5):280-9                                                                                                   | Excluded by abstract   |
| 234 | Deepanshi Yadav, Ashish Kumar and Vivek Chaudhary. Molar distalization by different intraoral device in orthodontics: A review. International Journal of Applied Dental Sciences 2021 March; 7(2): 432-436.                                                                                                                    | Excluded by abstract   |
| 235 | Kohli, S. S., & Kohli, V. S. (2020). Modified K-Loop Molar Distalization Archwire for Arch Development. Orthodontic Journal of Nepal. 2020 March. 10(1):79–82.                                                                                                                                                                 | Excluded by abstract   |
| 236 | Atout, B. Unilateral upper molar distalization; A Case report. Pakistan Orthodontic Journal, 8(1), 67-70.                                                                                                                                                                                                                      | Excluded by abstract   |
| 237 | Singal Is, Sidhu MS, Prabhakar M, Dabas A, Dogra N. Molar distalization with partially osseo-integrated buccal mini-implants along with sliding J hook to correct class II malocclusion- a cephalometric study. Indian Journal of Health Sciences and Care 2017 Nov; 4(2): 70-77.                                              | Excluded by abstract   |
| 238 | Celebi AA. Mini-screw supported molar distalization: A new method. J Orthod Res 2015; 3:199-203.                                                                                                                                                                                                                               | Excluded by abstract   |
| 239 | Silvia R, Valeria S, Andrés G, Manuel B. Treatment of a Class II Division 2 Malocclusion in a Teenage Patient: Clinical Case Report. J Orthod Endod 2017 Oct; 3(3):13.                                                                                                                                                         | Excluded by abstract   |
| 240 | Manikandan, N. Effective En-Masse retraction of maxillary dentition with tuberosity mini-implant anchorage: A finite element analysis. Masters thesis, Ragas Dental College and Hospital, Chennai 2013 Sept.                                                                                                                   | Excluded by abstract   |
| 241 | Vishnu Anusa, Shwetha G.Kumar Shashi C.H, Arya Siddarth,Suma T. Molar distalization for space gaining in orthodontics. J Pearlident 2020 Oct; 20(1):20-27.                                                                                                                                                                     | Excluded by abstract   |
| 242 | Shuji Yamaguchi. Cephalometric changes of maxillary molar distalization using a non-compliance appliance: thesis 2014, 4-50.                                                                                                                                                                                                   | Excluded by abstract   |
| 243 | Quinzi V, Marchetti E, Guerriero L, Bosco F, Marzo G, Mummolo S. Dentoskeletal Class II Malocclusion: Maxillary Molar Distalization with No-Compliance Fixed Orthodontic Equipment. Dent J (Basel). 2020 Mar 18;8(1):26                                                                                                        | Excluded by abstract   |
| 244 | Valiollah Arash, Farhad Sobouti, Sina HaghaniFar, Iman Dabbaghian, Ali Bijani, Alizadeh-Navaei. Dentoskeletal Effect Induced by Hyrax Screw Used in Maxillary Molar Distalization: Before–After Study in Class II Patients. Iran J Ortho 2014 December; 9(3):e3746.                                                            | Excluded by abstract   |
| 245 | Park, Jae Hyun. Temporary Anchorage Devices in Clinical Orthodontics. The Use of TADs to Correct Challenging Class II Sagittal Discrepancies 2020:169–183.                                                                                                                                                                     | Excluded by abstract   |
| 246 | Sodagar A, Ahmad Akhouni MS, Rafighii A, Arab S. Fabrication and evaluation of a noncompliant molar distalizing appliance: bonded molar distalizer. J Dent (Tehran). 2011 Summer;8(3):107-16                                                                                                                                   | Excluded by abstract   |
| 247 | Kook YA, Bayome M, Trang VT, Kim HJ, Park JH, Kim KB, Behrents RG. Treatment effects of a modified palatal anchorage plate for distalization evaluated with cone-beam computed tomography. Am J Orthod Dentofacial Orthop. 2014 Jul;146(1):47-54                                                                               | Excluded; not relevant |

|     |                                                                                                                                                                                                                                                                                                                                                                                   |                         |
|-----|-----------------------------------------------------------------------------------------------------------------------------------------------------------------------------------------------------------------------------------------------------------------------------------------------------------------------------------------------------------------------------------|-------------------------|
| 248 | Chung KR, Kim SH, Chaffee MP, Nelson G. Molar distalization with a partially integrated mini-implant to correct unilateral Class II malocclusion. <i>Am J Orthod Dentofacial Orthop.</i> 2010 Dec;138(6):810-9                                                                                                                                                                    | Excluded; not relevant  |
| 249 | Saxena R, Kumar PS, Upadhyay M, Naik V. A clinical evaluation of orthodontic mini-implants as intraoral anchorage for the intrusion of maxillary anterior teeth. <i>World J Orthod.</i> 2010 Winter;11(4):346-51                                                                                                                                                                  | Excluded; not relevant  |
| 250 | Asscherickx K, Vannet BV, Bottenberg P, Wehrbein H, Sabzevar MM. Clinical observations and success rates of palatal implants. <i>Am J Orthod Dentofacial Orthop.</i> 2010 Jan;137(1):114-22                                                                                                                                                                                       | Excluded; not relevant  |
| 251 | Longerich UJ, Thureau M, Kolk A. Development of a new device for maxillary molar distalization with high pseudoelastic forces to overcome slider friction: the Longslider--a modification of the Beneslider. <i>Oral Surg Oral Med Oral Pathol Oral Radiol.</i> 2014 Jul;118(1):22-34                                                                                             | Excluded; not relevant  |
| 252 | Park JH, Tai K, Ikeda M, Kanao A. Regaining leeway space and anterior crossbite correction with a modified maxillary molar distalizing appliance. <i>J Clin Pediatr Dent.</i> 2013 Spring;37(3):329-34                                                                                                                                                                            | Excluded; not relevant  |
| 253 | Wilmes B, Vasudavan S, Drescher D. CAD-CAM-fabricated mini-implant insertion guides for the delivery of a distalization appliance in a single appointment. <i>Am J Orthod Dentofacial Orthop.</i> 2019 Jul;156(1):148-156                                                                                                                                                         | Excluded; not relevant  |
| 254 | Paredes-Gallardo V, Bellot-Arcís C, García-Sanz V. Miniscrew mechanics for molar distalization and incisor intrusion in a patient with a Class II brachyfacial pattern and gummy smile. <i>Am J Orthod Dentofacial Orthop.</i> 2020 Aug;158(2):273-285                                                                                                                            | Excluded; not relevant  |
| 255 | Türköz C, Ataç MS, Tuncer C, Balos Tuncer B, Kaan E. The effect of drill-free and drilling methods on the stability of mini-implants under early orthodontic loading in adolescent patients. <i>Eur J Orthod.</i> 2011 Oct;33(5):533-6                                                                                                                                            | Excluded; not relevant  |
| 256 | Fouda AS, Attia KH, Abouelezz AM, El-Ghafour MA, Aboufotouh MH. Anchorage control using miniscrews in comparison to Essix appliance in treatment of postpubertal patients with Class II malocclusion using Carrière Motion Appliance. <i>Angle Orthod.</i> 2022 Jan 1;92(1):45-54                                                                                                 | Excluded; not relevant  |
| 257 | Wang H, Feng J, Lu P, Shen G. Correction of a skeletal Class II malocclusion with severe crowding by a specially designed rapid maxillary expander. <i>Am J Orthod Dentofacial Orthop.</i> 2015 Feb;147(2):242-51                                                                                                                                                                 | Excluded; not relevant  |
| 258 | Senişik NE, Türkahraman H. Treatment effects of intrusion arches and mini-implant systems in deepbite patients. <i>Am J Orthod Dentofacial Orthop.</i> 2012 Jun;141(6):723-33                                                                                                                                                                                                     | Excluded; not relevant  |
| 259 | Liu YH, Ding WH, Liu J, Li Q. Comparison of the differences in cephalometric parameters after active orthodontic treatment applying mini-screw implants or transpalatal arches in adult patients with bialveolar dental protrusion. <i>J Oral Rehabil.</i> 2009 Sep;36(9):687-95                                                                                                  | Excluded; not relevant  |
| 260 | Upadhyay M, Nagaraj K, Yadav S, Saxena R. Mini-implants for en masse intrusion of maxillary anterior teeth in a severe Class II division 2 malocclusion. <i>J Orthod.</i> 2008 Jun;35(2):79-89                                                                                                                                                                                    | Excluded; not relevant  |
| 261 | Choi NC, Park YC, Lee HA, Lee KJ. Treatment of Class II protrusion with severe crowding using indirect miniscrew anchorage. <i>Angle Orthod.</i> 2007 Nov;77(6):1109-18                                                                                                                                                                                                           | Excluded; not relevant  |
| 262 | Bondemark L. Orthodontic magnets. A study of force and field pattern, biocompatibility and clinical effects. <i>Swed Dent J Suppl.</i> 1994;99:1-148                                                                                                                                                                                                                              | Excluded; not relevant  |
| 263 | Park HS, Bae SM, Kyung HM, Sung JH. Simultaneous incisor retraction and distal molar movement with microimplant anchorage. <i>World J Orthod.</i> 2004 Summer;5(2):164-71                                                                                                                                                                                                         | Excluded; not relevant  |
| 264 | Garino F, Garino GB. Distalization of maxillary molars using the speed system: a clinical and radiological evaluation. <i>World J Orthod.</i> 2004 Winter;5(4):317-23                                                                                                                                                                                                             | Excluded; not relevant  |
| 265 | Chen C, Zhang XR. [Treatment of adult bimaxillary arch protrusion with micro-implant anchorage]. <i>Shanghai Kou Qiang Yi Xue.</i> 2015 Feb;24(1):76-82                                                                                                                                                                                                                           | Excluded; not relevant  |
| 266 | Keles A, Erverdi N, Sezen S. Bodily distalization of molars with absolute anchorage. <i>Angle Orthod.</i> 2003 Aug;73(4):471-82                                                                                                                                                                                                                                                   | Excluded; not relevant  |
| 267 | Young KA, Melrose CA, Harrison JE. Skeletal anchorage systems in orthodontics: absolute anchorage. A dream or reality? <i>J Orthod.</i> 2007 Jun;34(2):101-10                                                                                                                                                                                                                     | Excluded; not relevant  |
| 268 | Karad A. KIDS: a new approach to distalize maxillary molars. <i>World J Orthod.</i> 2008 Fall;9(3):244-54                                                                                                                                                                                                                                                                         | Excluded; not relevant  |
| 269 | NCT03839303. Comparison Between Mini Implant Supported Appliance and Headgear in Treatment of Maxillary Excess in Growing Patients. <a href="https://www.clinicaltrials.gov/ct2/show/NCT03839303?cond=distalization+with+mini+implants&amp;draw=2&amp;rank=1">https://www.clinicaltrials.gov/ct2/show/NCT03839303?cond=distalization+with+mini+implants&amp;draw=2&amp;rank=1</a> | Excluded; Ongoing study |
| 270 | NCT04814173. The Efficacy of Tow Mechanics for Total-maxillary-arch- distalization. <a href="https://www.clinicaltrials.gov/ct2/show/NCT04814173?cond=distalization+with+mini+implants&amp;draw=2&amp;rank=2">https://www.clinicaltrials.gov/ct2/show/NCT04814173?cond=distalization+with+mini+implants&amp;draw=2&amp;rank=2</a>                                                 | Excluded; Ongoing study |
| 271 | NCT05245929. En Masse Distalization Via Skeletal Anchorage. <a href="https://www.clinicaltrials.gov/ct2/show/NCT05245929?cond=distalization&amp;draw=2&amp;rank=1">https://www.clinicaltrials.gov/ct2/show/NCT05245929?cond=distalization&amp;draw=2&amp;rank=1</a>                                                                                                               | Excluded; Ongoing study |
| 272 | NCT05171738. Distalization Via Skeletally-anchored Distaljet Appliance With Two Approaches of Micro-osteoperforations. <a href="https://www.clinicaltrials.gov/ct2/show/NCT05171738?cond=maxillary+molar+distalization&amp;draw=2&amp;rank=2">https://www.clinicaltrials.gov/ct2/show/NCT05171738?cond=maxillary+molar+distalization&amp;draw=2&amp;rank=2</a>                    | Excluded; Ongoing study |
| 273 | Batra P, Ragini. The J-Molar Distalizer for bodily molar movement. <i>J Clin Orthod.</i> 2014 May;48(5):312-5                                                                                                                                                                                                                                                                     | Excluded; no fulltext   |
| 274 | Zhang HJ, Ji GP, Shen G. [A clinical study on effects of distalization of whole upper arch in borderline Class II malocclusion using micro-screw anchorages in inferiorzygomatic area]. <i>Shanghai Kou Qiang Yi Xue.</i> 2013 Jun;22(3):310-5                                                                                                                                    | Excluded; no fulltext   |

|     |                                                                                                                                                                                                                                                                                            |                             |
|-----|--------------------------------------------------------------------------------------------------------------------------------------------------------------------------------------------------------------------------------------------------------------------------------------------|-----------------------------|
| 275 | AKSHAY MOHAN, HARISH BABU2, NIVETHIGAA BALAKRISHNAN. En Masse Distalization As A Treatment Option In Correction Of Skeletal Class II Malocclusion. Journal of Contemporary Issues in Business and Government 2021 Feb;27( 2): 3076-3084.                                                   | Excluded; no fulltext       |
| 276 | Catalfamo L, Gasperoni E, Celli D, Deli R. Class II treatment with the smart distalization technique. J Clin Orthod. 2012 Oct;46(10):613-24                                                                                                                                                | Excluded; no fulltext       |
| 277 | Nappee FJ, Nappee-Mievilly M, Hilgers JJ. The Pendulis Appliance for Bone-Anchored Maxillary Molar Distalization. J Clin Orthod. 2019;53(11):636-646                                                                                                                                       | Excluded; no fulltext       |
| 278 | Safaa M. Gaballa, Eman M. Elshorbagy, Safaa A. Ghobashy, Mohamed Ellithy. DENTO-FACIAL EFFECTS AFTER THE USE OF BONE ANCHORAGE PENDULUM APPLIANCE. Egyptian Orthodontic Journal 2010 Dec; 38:45-77.                                                                                        | Excluded; no fulltext       |
| 279 | Haq Arfan-ul, Waheed ul Hamid, M Naseer Ahmad Chaudhry. Comparison of Jones Jig and Distal Jet molar distalizing appliances. Pakistan Oral & Dental Journal 2010 Dec; 30(2): 371.                                                                                                          | Excluded; no fulltext       |
| 280 | Keim RG. Solving the molar-distalization dilemma. J Clin Orthod. 2012 Aug;46(8):453-4                                                                                                                                                                                                      | Excluded; no fulltext       |
| 281 | Grec RH, Janson G, Branco NC, Moura-Grec PG, Patel MP, Castanha Henriques JF. Intraoral distalizer effects with conventional and skeletal anchorage: a meta-analysis. Am J Orthod Dentofacial Orthop. 2013 May;143(5):602-15                                                               | Excluded; Meta-analysis     |
| 282 | Raghis TR, Alsulaiman TMA, Mahmoud G, Youssef M. Efficiency of maxillary total arch distalization using temporary anchorage devices (TADs) for treatment of Class II-malocclusions: A systematic review and meta-analysis. Int Orthod. 2022 Sep;20(3):100666.                              | Excluded; Meta-analysis     |
| 283 | Jambi S, Thiruvengkatachari B, O'Brien KD, Walsh T. Orthodontic treatment for distalising upper first molars in children and adolescents. Cochrane Database of Systematic Reviews 2013, Issue 10. Art. No.: CD008375                                                                       | Excluded; Systematic Review |
| 284 | Levin L, Vasiliauskas A, Armalaite J, Kubiliute K. Comparison of skeletal anchorage distalizers effect in maxillary buccal segment: A systematic review. Stomatologija. 2018;20(3):66-72                                                                                                   | Excluded; Systematic Review |
| 285 | Soheilifar S, Mohebi S, Ameli N. Maxillary molar distalization using conventional versus skeletal anchorage devices: A systematic review and meta-analysis. Int Orthod. 2019 Sep;17(3):415-424                                                                                             | Excluded; Systematic Review |
| 286 | Antonarakis GS, Kiliaridis S. Maxillary molar distalization with noncompliance intramaxillary appliances in Class II malocclusion. A systematic review. Angle Orthod. 2008 Nov;78(6):1133-40                                                                                               | Excluded; Systematic Review |
| 287 | Bayome M, Park JH, Bay C, Kook YA. Distalization of maxillary molars using temporary skeletal anchorage devices: A systematic review and meta-analysis. Orthod Craniofac Res. 2021 Mar;24 Suppl 1:103-112                                                                                  | Excluded; Systematic Review |
| 288 | Mohamed RN, Basha S, Al-Thomali Y. Maxillary molar distalization with miniscrew-supported appliances in Class II malocclusion: A systematic review. Angle Orthod. 2018 Jul;88(4):494-502                                                                                                   | Excluded; Systematic Review |
| 289 | Ahmed I. Atalla, Hisham A. Afifi. A simple method of molar anchorage with mini-screw implants. MARZO DENTAL CADMOS 2019 Feb;87(3):176-182.                                                                                                                                                 | Excluded; case report       |
| 290 | Wilmes B, Katyal V, Drescher D. Mini-implant-borne Pendulum B appliance for maxillary molar distalisation: design and clinical procedure. Aust Orthod J. 2014 Nov;30(2):230-9                                                                                                              | Excluded; case report       |
| 291 | Lim SM, Hong RK. Distal movement of maxillary molars using a lever-arm and mini-implant system. Angle Orthod. 2008 Jan;78(1):167-75                                                                                                                                                        | Excluded; case report       |
| 292 | Chiu G, Chang C, Roberts WE. Interdisciplinary treatment for a compensated Class II partially edentulous malocclusion: Orthodontic creation of a posterior implant site. Am J Orthod Dentofacial Orthop. 2018 Mar;153(3):422-435                                                           | Excluded; case report       |
| 293 | Suzuki EY, Suzuki B. The Indirect Palatal Miniscrew Anchorage and Distalization Appliance. J Clin Orthod. 2016 Feb;50(2):80-96                                                                                                                                                             | Excluded; case report       |
| 294 | Mendes Júnior TE, Lima AB, Mendes TE, Mendes CV, Rosário HD, Paranhos LR. Distalization controlled with the use of lip-bumper and mini-screw as anchorage: a new approach. Int J Orthod Milwaukee. 2015 Spring;26(1):29-32                                                                 | Excluded; case report       |
| 295 | Choi YJ, Lee JS, Cha JY, Park YC. Total distalization of the maxillary arch in a patient with skeletal Class II malocclusion. Am J Orthod Dentofacial Orthop. 2011 Jun;139(6):823-33                                                                                                       | Excluded; case report       |
| 296 | Palone M, Baciliero M, Cervinara F, Maino GB, Paoletto E, Cremonini F, Lombardo L. Class II treatment of transverse maxillary deficiency with a single bone-borne appliance and hybrid clear aligner approach in an adult patient: A case report. J World Fed Orthod. 2022 Apr;11(2):80-94 | Excluded; case report       |
| 297 | Gracco A, Luca L, Siciliani G. Molar distalisation with skeletal anchorage. Aust Orthod J. 2007 Nov;23(2):147-52                                                                                                                                                                           | Excluded; case report       |
| 298 | Keles A. Unilateral distalization of a maxillary molar with sliding mechanics: a case report. J Orthod. 2002 Jun;29(2):97-100                                                                                                                                                              | Excluded; case report       |
| 299 | Nappée-Miévilley M, Nappée FJ, Kerbrat JB, Goudot P. Le pendulis : un dispositif de distalisation molaire sur minivis palatine [The pendulis appliance: a palatal miniscrew supported molar distalization device]. Orthod Fr. 2014 Sep;85(3):265-73                                        | Excluded; case report       |
| 300 | Nishimura M, Sannohe M, Nagasaka H, Igarashi K, Sugawara J. Nonextraction treatment with temporary skeletal anchorage devices to correct a Class II Division 2 malocclusion with excessive gingival display. Am J Orthod Dentofacial Orthop. 2014 Jan;145(1):85-94                         | Excluded; case report       |
| 301 | Auladell A, De La Iglesia F, Quevedo O, Walter A, Puigdollers A. The efficiency of molar distalization using clear aligners and mini-implants: Two clinical cases. Int Orthod. 2022 Mar;20(1):100604                                                                                       | Excluded; case report       |

|     |                                                                                                                                                                                                                                                                                                |                       |
|-----|------------------------------------------------------------------------------------------------------------------------------------------------------------------------------------------------------------------------------------------------------------------------------------------------|-----------------------|
| 302 | Gelgor IE, Karaman AI, Buyukyilmaz T. Use of the intraosseous screw for unilateral upper molar distalization and found well balanced occlusion. Head Face Med. 2006 Nov 9;2:38                                                                                                                 | Excluded; case report |
| 303 | Gandhi V , Mehta F , Parekh H , Agrawal M . A new appliance for efficient molar distalization. J Clin Orthod. 2017 Nov;51(11):738-747                                                                                                                                                          | Excluded; case report |
| 304 | Doğan K, Başaran Ğ, Hamamci N, Hamamci O. Noncompliance therapy: Veltri appliance. World J Orthod. 2009 Spring;10(1):e1-6                                                                                                                                                                      | Excluded; case report |
| 305 | Velo S, Rotunno E, Cozzani M. The Implant Distal Jet. J Clin Orthod. 2007 Feb;41(2):88-93                                                                                                                                                                                                      | Excluded; case report |
| 306 | Byloff FK, Kärcher H, Clar E, Stoff F. An implant to eliminate anchorage loss during molar distalization: a case report involving the Graz implant-supported pendulum. Int J Adult Orthodon Orthognath Surg. 2000 Summer;15(2):129-37                                                          | Excluded; case report |
| 307 | Cozzani M, Thomas WM, Gianelly AA. Distalizzazione asimmetrica di molare superiore con magneti: caso clinico [Asymmetrical distalization of upper molars with magnets. A clinical case]. Mondo Ortod. 1989 Sep-Oct;14(5):687-92                                                                | Excluded; case report |
| 308 | Winsauer H, Muchitsch AP, Winsauer C, Milnes R, Vlachojannis J, Walter A. The TopJet for routine bodily molar distalization. J Clin Orthod. 2013 Feb;47(2):96-107                                                                                                                              | Excluded; case report |
| 309 | Ludwig B, Glasl B, Kinzinger GS, Walde KC, Lissan JA. The skeletal frog appliance for maxillary molar distalization. J Clin Orthod. 2011 Feb;45(2):77-84                                                                                                                                       | Excluded; case report |
| 310 | Jeon JM, Yu HS, Baik HS, Lee JS. En-masse distalization with miniscrew anchorage in Class II nonextraction treatment. J Clin Orthod. 2006 Aug;40(8):472-6                                                                                                                                      | Excluded; case report |
| 311 | Li, C. Chung, C.H. A Simple Technique Using a Modified Nance Appliance as Anchorage for Maxillary Molar Distalization—Two Case Reports. Appl. Sci 2022 Jan. 12(2):768.                                                                                                                         | Excluded; case report |
| 312 | Cerrillo Daniel Pérez, José Hermosillo, Ivan Paredes-Vieyra Jorge. Orthodontic treatment of Class II Division 2 malocclusion patient: with Pendulum Fixed Appliance and TAD's for improved anchorage: A case report. Journal of Dental and Medical Sciences (IOSR-JDMS) 2020 Dec 19(12):50-56. | Excluded; case report |
| 313 | Haq Arfan-ul, Waheed ul Hamid, M Naseer Ahmad Chaudhry, Raabia Latif. EFFECTS OF DISTAL JET APPLIANCE IN CLASS-II MOLAR CORRECTION. Pakistan Oral & Dental Journal 2010 June; 30 (1).                                                                                                          | Excluded; No MIs      |
| 314 | Dawaba MM, Abd-ELMonem MM, Salem MA, Saleh SA. Distalization of Maxillary Molars by Miniscrews and EZ Slider. Al -Azhar Assiut Dental J 2018 Oct; 57:63.                                                                                                                                       | Excluded; No data     |
| 315 | Gelgör IE, Büyükyilmaz T, Karaman AI, Dolanmaz D, Kalayci A. Intraosseous screw-supported upper molar distalization. Angle Orthod. 2004 Dec;74(6):838-50                                                                                                                                       | Included              |
| 316 | Kircelli BH, Pektaş ZO, Kircelli C. Maxillary molar distalization with a bone-anchored pendulum appliance. Angle Orthod. 2006 Jul;76(4):650-9                                                                                                                                                  | Included              |
| 317 | Escobar SA, Tellez PA, Moncada CA, Villegas CA, Latorre CM, Oberti G. Distalization of maxillary molars with the bone-supported pendulum: a clinical study. Am J Orthod Dentofacial Orthop. 2007 Apr;131(4):545-9                                                                              | Included              |
| 318 | Gelgor IE, Karaman AI, Buyukyilmaz T. Comparison of 2 distalization systems supported by intraosseous screws. Am J Orthod Dentofacial Orthop. 2007 Feb;131(2): 161.e1-8                                                                                                                        | Included              |
| 319 | Oberti G, Villegas C, Ealo M, Palacio JC, Baccetti T. Maxillary molar distalization with the dual-force distalizer supported by mini-implants: a clinical study. Am J Orthod Dentofacial Orthop. 2009 Mar;135(3):282.e1-5; discussion 282-3                                                    | Included              |
| 320 | Polat-Ozsoy O, Kircelli BH, Arman-Ozçirpici A, Pektaş ZO, Uçkan S. Pendulum appliances with 2 anchorage designs: conventional anchorage vs bone anchorage. Am J Orthod Dentofacial Orthop. 2008 Mar;133(3):339.e9-339.e17                                                                      | Included              |
| 321 | Kinzinger GS, Gül den N, Yildizhan F, Diedrich PR. Efficiency of a skeletonized distal jet appliance supported by miniscrew anchorage for noncompliance maxillary molar distalization. Am J Orthod Dentofacial Orthop. 2009 Oct;136(4):578-86                                                  | Included              |
| 322 | Yamada K, Kuroda S, Deguchi T, Takano-Yamamoto T, Yamashiro T. Distal movement of maxillary molars using miniscrew anchorage in the buccal interradicular region. Angle Orthod. 2009 Jan;79(1):78-84.                                                                                          | Included              |
| 323 | Gómez SL, Betancur JJ, Arismendi JA, Gil JH. Clinical and radiographic comparison of the pendulum effect with skeletal anchorage versus dentoalveolar anchorage. Rev Fac Odontol Univ Antioq 2012; 23(2): 268-291.                                                                             | Included              |
| 324 | Sar C, Kaya B, Ozsoy O, Özçirpici AA. Comparison of two implant-supported molar distalization systems. Angle Orthod. 2013 May;83(3):460-7                                                                                                                                                      | Included              |
| 325 | Bechtold TE, Kim JW, Choi TH, Park YC, Lee KJ. Distalization pattern of the maxillary arch depending on the number of orthodontic miniscrews. Angle Orthod. 2013 Mar;83(2):266-73                                                                                                              | Included              |
| 326 | Mariani L, Maino G, Caprioglio A. Skeletal versus conventional intraoral anchorage for the treatment of class II malocclusion: dentoalveolar and skeletal effects. Prog Orthod. 2014;15(1):43                                                                                                  | Included              |
| 327 | Cozzani M, Pasini M, Zallio F, Ritucci R, Mutinelli S, Mazzotta L, Giuca MR, Piras V. Comparison of maxillary molar distalization with an implant-supported distal jet and a traditional tooth-supported distal jet appliance. Int J Dent. 2014;2014:937059.                                   | Included              |
| 328 | Nienkemper M, Wilmes B, Pauls A, Yamaguchi S, Ludwig B, Drescher D. Treatment efficiency of mini-implant-borne distalization depending on age and second-molar eruption. J Orofac Orthop. 2014 Mar;75(2):118-32                                                                                | Included              |
| 329 | Wilmes B, Drescher D. Application and effectiveness of the Beneslider: a device to move molars distally. World J Orthod. 2010 Winter;11(4):331-40.                                                                                                                                             | Included              |
| 330 | Caprioglio A, Cafagna A, Fontana M, Cozzani M. Comparative evaluation of molar distalization therapy using pendulum and distal screw appliances. Korean J Orthod. 2015 Jul;45(4):171-9.                                                                                                        | Included              |
| 331 | Duran GS, Görgülü S, Dindaroğlu F. Three-dimensional analysis of tooth movements after palatal miniscrew-supported molar distalization. Am J Orthod Dentofacial Orthop. 2016 Jul;150(1):188-97                                                                                                 | Included              |
| 332 | Cozzani M, Fontana M, Maino G, Maino G, Palpacelli L, Caprioglio A. Comparison between direct vs indirect anchorage in two miniscrew-supported distalizing devices. Angle Orthodontist 2016; 86(3): 399 - 406.                                                                                 | Included              |

|     |                                                                                                                                                                                                                                                                                                                                  |          |
|-----|----------------------------------------------------------------------------------------------------------------------------------------------------------------------------------------------------------------------------------------------------------------------------------------------------------------------------------|----------|
| 333 | Mah SJ, Kim JE, Ahn EJ, Nam JH, Kim JY, Kang YG. Analysis of midpalatal miniscrew-assisted maxillary molar distalization patterns with simultaneous use of fixed appliances: A preliminary study. Korean J Orthod. 2016 Jan;46(1):55-61                                                                                          | Included |
| 334 | Cambiano AO, Janson G, Fuziy A, Garib DG, Lorenzoni DC. Changes consequent to maxillary molar distalization with the bone-anchored pendulum appliance. J Orthod Sci. 2017 Oct-Dec;6(4):141-146                                                                                                                                   | Included |
| 335 | Mohammed Ali Farag, Medhat El-Sakhawy, Mahmoud E. El-Shennawy, and Ghada El-Mehy. Comparison between bone supported-pendulum appliance and lever-arm mini-implant system in maxillary molar distalization in class II malocclusion. E.D.J 2018 Oct; 64(4): 3047-3056                                                             | Included |
| 336 | Cassetta M, Brandetti G, Altieri F. Miniscrew-supported distal jet versus conventional distal jet appliance: A pilot study. J Clin Exp Dent. 2019 Jul 1;11(7):e650-e658                                                                                                                                                          | Included |
| 337 | Bechtold TE, Park YC, Kim KH, Jung H, Kang JY, Choi YJ. Long-term stability of miniscrew anchored maxillary molar distalization in Class II treatment. Angle Orthod. 2020 May 1;90(3):362-368                                                                                                                                    | Included |
| 338 | Bozkaya E, Tortop T, Yüksel S, Kaygısız E. Evaluation of the effects of the hybrid Pendulum in comparison with the conventional Pendulum appliance. Angle Orthod. 2020 Mar;90(2):194-201                                                                                                                                         | Included |
| 339 | Abdelhady NA, Tawfik MA, Hammad SM. Maxillary molar distalization in treatment of angle class II malocclusion growing patients: Uncontrolled clinical trial. Int Orthod. 2020 Mar;18(1):96-104                                                                                                                                   | Included |
| 340 | Ibrahim M Negm, Riyad A Iskander, khaled Aboulazm. THREE-DIMENSIONAL ASSESSMENT OF SKELETAL FROG APPLIANCE OUTCOMES VIA CONE BEAM COMPUTERIZED TOMOGRAPHY. Egyptian Orthodontic Journal 2021 June; 59:13-25                                                                                                                      | Included |
| 341 | Altieri F, Mezio M, Guarnieri R, Cassetta M. Comparing Distal-Jet with Dental Anchorage to Distal-Jet with Skeletal Anchorage: A Prospective Parallel Cohort Study. Dent J (Basel). 2022 Sep 27;10(10):179.                                                                                                                      | Included |
| 342 | Nunes Rosa WG, de Almeida-Pedrin RR, Oltramari PVP, de Castro Conti ACF, Fernandes Poleti TMF, Shroff B, de Almeida MR. Total arch maxillary distalization using infrazygomatic crest miniscrews in the treatment of Class II malocclusion: a prospective study. Angle Orthod. 2022 Sep 20. Epub ahead of print. PMID: 36126679. | Included |
